# Supplementary material for: Multistability and Reversibility of Aerobic Granular Sludge Microbial Communities Upon Changes From Simple to Complex Synthetic Wastewater and Back
Source: Front Microbiol. 2020 Nov 26;11:574361. doi: 10.3389/fmicb.2020.574361 (PMC7726351; doi:10.3389/fmicb.2020.574361)
Supplement: Supplementary Data Sheet 3 — P-values of the t-test between the mean relative abundance of the bacterial taxa (at genus level, after Hellinger transformation) in the different stable states. Mean relative abundances of the bacterial taxa in the different stable states. [file Data_Sheet_3.csv]

taxon	p_val state1 vs 2	p_val state1 vs 3	p_val state1 vs 4	p_val state1 vs 5	p_val state1 vs 6	p_val state1 vs 7	p_val state2 vs 3	p_val state2 vs 4	p_val state2 vs 5	p_val state2 vs 6	p_val state2 vs 7	p_val state3 vs 4	p_val state3 vs 5	p_val state3 vs 6	p_val state3 vs 7	p_val state4 vs 5	p_val state4 vs 6	p_val state4 vs 7	p_val state5 vs 6	p_val state5 vs 7	p_val state6 vs 7	mean_state1	mean_state2	mean_state3	mean_state4	mean_state5	mean_state6	mean_state7
g__Pseudomonas	0.8769780776	0.1792957985	0.0006716224	0.003707645	0.0314173783	0.1201835212	0.0101946174	8.62E-08	0.00000235	0.0010667519	0.0028499973	2.32E-10	6.35E-09	0.0000144	0.0000072	0.3888853122	0.0886944152	0.0021825517	0.3460432309	0.0234712855	0.2808382838	0.0001113473	0.0000577	0.0000263	0.0003198631	0.0002585905	0.0002026209	0.0001378527
g__Acinetobacter	0.00000667	0.0000142	0.0000206	0.000022	0.0225934583	0.000092	0.5641977281	0.7926845433	0.2845573718	0.0017936986	0.000000594	0.9011852162	0.6615517102	0.0046722117	0.000000756	0.6805337424	0.0109833962	0.000000639	0.0072924347	0.00000091	0.00000681	0.000574579	0.0000731	0.00008	0.0001780678	0.0000983	0.0003046367	0.0042977322
g__Thiothrix	4.13E-18	2.04E-10	8.18E-11	3.37E-09	0.0004508675	0.0000271	0.0568981151	0.000000035	0.0023104107	4.31E-23	0.00000754	0.0000034	0.00023354	6.45E-12	0.00000216	0.2098752274	1.01E-16	0.4007392828	5.11E-13	0.0837497119	2.09E-08	0.0140264003	0.0932240934	0.1200872415	0.0530389068	0.0688990576	0.0060868022	0.0480605498
g__Candidatus Competibacter	0.0000199	8.09E-08	1.66E-12	3.38E-13	2.37E-14	4.69E-11	1.92E-12	4.44E-15	9.93E-16	1.34E-16	9.82E-15	2.84E-08	2.56E-10	7.59E-12	0.0030412912	1.89E-16	3.19E-17	0.0000261	0.0322412084	1.66E-11	4.76E-13	0.0718463548	0.1294600063	0.0281440091	0.0079981677	0.0010882998	0.0008116255	0.0180102108
g__CPB_S60	2.43E-11	8.71E-12	3.59E-13	3.04E-13	2.87E-13	4.29E-16	0.0967428426	7.55E-15	4.14E-16	5E-16	0.000000001	1.99E-10	2.41E-11	2.66E-11	4.41E-08	9.14E-08	0.000000002	0.3109462973	0.1319074303	0.1351053721	0.0621736849	0.0034879706	0.0004077303	0.0003152973	0.0000474	0.00000506	0.00000195	0.0000757
g__CPB_S18	2.04E-10	1.68E-10	5.07E-11	4.92E-11	4.92E-11	4.97E-11	0.0001458224	9.28E-08	7.62E-08	7.62E-08	8.41E-08	5.24E-10	1.56E-09	1.56E-09	4.35E-10	0.0898180494	0.0898180494	0.6024719374	NA	0.3281832619	0.3281832619	0.0320580308	0.001692199	0.0002538544	0.00000372	0	0	0.00000209
g__CPB_C22&F32	0.00000489	5.3E-09	1.64E-14	4.01E-20	0.0003092153	3.62E-16	1.09E-08	1.5E-12	1.59E-18	0.445917635	2.76E-10	0.0781851583	0.6256902243	1.08E-08	0.0000178	0.0196413285	1.56E-11	4.27E-08	9.1E-13	2.02E-10	0.0000697	0	0.0007523371	0.014257485	0.0253094499	0.0131536249	0.0016629565	0.0038765631
g__Dokdonella	0.18004931	0.0013528459	0.000000477	8.19E-21	1.55E-11	0.1451406562	6.34E-08	0.0000014	1.32E-19	8.64E-11	0.0244663588	5.67E-13	6.59E-21	4.68E-12	0.6805473752	1.21E-18	4.83E-09	0.0000034	0.0000274	7.7E-23	3.89E-13	0.0002217857	0.0002663901	0.0000947	0.0006920391	0.0063068385	0.00329142	0.0002186803
g__Chiayiivirga	NA	NA	1.49E-12	8.63E-17	0.0000425	0.0021784485	NA	1.49E-12	8.63E-17	0.0000425	0.0021784485	1.49E-12	8.63E-17	0.0000425	0.0021784485	0.0000532	0.7754402347	0.0002093008	0.0030291511	2.82E-10	0.0167181234	0	0	0	0.0000639	0.0001384502	0.0000746	0.0000211
g__Stenotrophomonas	0.0000682	0.0019915331	0.0000314	0.0005641852	0.0003368244	0.3231906697	0.0249637029	0.3825416309	0.0700475322	0.000000324	0.0003016215	0.0042209658	0.458911505	0.00000158	0.0187410042	0.0066658851	0.000000225	0.0000937	0.000000922	0.0044903027	0.0000486	0.0000728	0.00000426	0.000012	0.00000384	0.0000117	0.000397047	0.0000553
g__sipK9	1.67E-08	0.00000364	5.93E-29	1.22E-20	3.12E-11	4.19E-10	0.0335504206	1.77E-17	2.86E-19	1.65E-08	2.79E-08	0.00000206	1.09E-16	0.0000122	0.000000625	2.11E-12	0.4634688295	0.0028298589	0.000000001	0.0017006507	0.0178942291	0.000111181	0.0004014684	0.0006440994	0.0015197886	0.0049621754	0.0017628024	0.0030573582
g__Pseudoxanthomonas	0.00000152	3.32E-10	0.0162070234	3.87E-09	5.54E-11	3.83E-11	8.14E-19	2.45E-14	7.09E-08	5.36E-15	9.34E-26	1.59E-29	0.000000389	0.6570782977	1.76E-08	5.42E-21	1.07E-25	1.05E-34	0.00000351	8.6E-14	0.0001443005	0.0362381551	0.012093427	0.0024642753	0.0249818997	0.0066629913	0.0025537283	0.0008343311
f__Xanthomonadaceae;g__unclassified	NA	NA	NA	0.0037451366	0.0001400577	0.1633357489	NA	NA	0.0037451366	0.0001400577	0.1633357489	NA	0.0037451366	0.0001400577	0.1633357489	0.0037451366	0.0001400577	0.1633357489	0.0002139165	0.1823084876	0.0001672568	0	0	0	0	0.00000811	0.0025349875	0.00000373
g__Lysobacter	0.0103745133	0.3696088874	7.73E-09	7.45E-26	4.64E-15	9.43E-11	0.0011946643	4.52E-08	2.34E-25	8.44E-15	3.59E-10	0.000000004	4.95E-26	3.72E-15	5.77E-11	8.98E-24	3.72E-14	0.1262577895	0.0906025048	9.57E-21	2.96E-12	0.0000155	0.0000331	0.0000105	0.0016597876	0.0140163811	0.0115959224	0.0018929874
g__Aquimonas	0.0003874908	0.000000016	0.0000291	0.7025851708	0.0000153	0.0362046454	1.56E-11	0.0575186932	2.27E-08	0.0296009801	2.96E-11	0.0045962567	8.99E-19	0.0002514315	2.13E-17	0.000000951	0.8607154644	1.26E-10	4.69E-08	0.0005936983	9.55E-12	0.003773721	0.0015339286	0.0002778673	0.0016048776	0.0034052165	0.0011453795	0.0051532106
g__Thermomonas	0.0212765687	0.9338414488	0.1306003868	3.12E-15	0.0005244914	0.0079916922	0.0081798191	0.6770859695	4.14E-14	0.0089493617	0.3240497323	0.1040017558	6.87E-15	0.0004794437	0.0050199367	1.01E-14	0.0066946723	0.2296665086	2.78E-09	1.27E-13	0.04944023	0.0000115	0.0000271	0.00000695	0.000048	0.0010439487	0.0001694871	0.0000542
g__Tahibacter	0.3060457926	8.11E-10	2.97E-12	8.32E-11	4.87E-14	6.78E-11	0.0002029005	0.000000975	0.0000103	0.000000161	0.0000696	8.86E-08	0.0003931498	0.0000168	0.2747285077	0.0000384	0.1938951563	0.0000253	0.0033654727	0.0389294034	0.000223073	0.0095145459	0.0088021517	0.0025574532	0.0010738876	0.001641013	0.0010340791	0.0022950987
g__CCM19a	4.88E-09	6.05E-15	5.92E-09	8.38E-16	1.6E-14	0.00017143	2.02E-08	0.4747404	0.000000585	0.00000351	0.0048733825	3.74E-11	0.2553591753	0.4350339253	3.19E-11	6.5E-10	8.97E-08	0.0117544569	0.8324495845	2.21E-10	1.6E-09	0.0005186135	0.0001758656	0.00003	0.0001965769	0.0000586	0.0000543	0.0003007235
g__Thiorhodospira	0.0599989331	0.00000345	4.59E-14	4.38E-15	0.0035306958	6.87E-09	0.0133752968	0.000000025	1.99E-12	0.4880768274	0.000000813	0.00000527	2.41E-10	0.0554147333	0.0001362175	0.0014932315	5.98E-08	0.9273474669	3.64E-12	0.0060718442	0.00000294	0	0.0000102	0.0000137	0.0000672	0.0001307841	0.0000108	0.0000682
g__Legionella	0.0236968641	0.0000355	0.0104378591	0.000122152	0.000122152	0.000122152	0.0000168	0.5803850869	0.0001458853	0.0001458853	0.0001458853	0.000015	0.00000885	0.00000885	0.00000885	0.0002543591	0.0002543591	0.0002543591	NA	NA	NA	0.0000382	0.00000963	0.0015522834	0.0000117	0	0	0
g__Coxiella	0.0000337	0.000000136	0.00000533	0.3245871275	0.0217370496	NA	0.8336394091	0.0009142308	0.0000377	0.0000895	0.0000337	0.00000116	0.000000137	0.000000138	0.000000136	0.000011	0.0031719575	0.00000533	0.0464747284	0.3245871275	0.0217370496	0	0.0001678551	0.0001206536	0.0000155	0.000000294	0.00000271	0
o__NKB5;g__unclassified	0.0009387441	0.1649954776	1.23E-08	0.0037814481	0.0000514	9.06E-09	0.0012580511	0.000000114	0.7864146953	0.1153028686	8.18E-09	0.00000675	0.0020539844	0.0001751015	0.00000335	0.00000101	0.0024398379	0.0041404617	0.1012245067	1.51E-08	0.0000885	0.000077	0.0000288	0.0001335821	0.00000395	0.0000413	0.0000224	0
g__Citrobacter	0.000230076	0.0000535	0.0074142881	0.0000642	5.49E-09	0.4315998067	0.0286783873	0.2972195371	0.0076913972	2.49E-08	0.00000294	0.0065005329	0.2149213466	0.000000077	0.0000152	0.0025291111	1.59E-08	0.0003060082	0.000000263	0.0000214	4.5E-09	0.00000838	0.0000296	0.000069	0.0000302	0.0002000255	0.0018350461	0.00000598
g__Enterobacter	NA	NA	NA	NA	0.0036003798	NA	NA	NA	NA	0.0036003798	NA	NA	NA	0.0036003798	NA	NA	0.0036003798	NA	0.0036003798	NA	0.0036003798	0	0	0	0	0	0.0010460179	0
g__Kluyvera	NA	0.165241706	NA	NA	NA	NA	0.165241706	NA	NA	NA	NA	0.165241706	0.165241706	0.165241706	0.165241706	NA	NA	NA	NA	NA	NA	0	0	0.0000159	0	0	0	0
g__Aeromonas	0.8973612279	0.5751576081	0.8711944274	0.9547869155	0.0000179	0.9947474142	0.4127775448	0.9456285673	0.8218159964	2.96E-08	0.9042558334	0.4541468844	0.5772905785	0.0001540107	0.5718193758	0.8105099466	0.000000764	0.8770814871	0.000000769	0.949214524	0.0000108	0.0000382	0.000021	0.0000418	0.0000599	0.0000483	0.0001519076	0.000048
g__Candidatus Nitrotoga	9.34E-09	0.00000226	0.0019651666	0.000000877	0.0004018983	4.23E-08	0.0347843929	5.32E-10	0.0004205478	0.0000101	0.2335997105	0.0012615894	0.9185581663	0.0276549032	0.2023199205	0.00000263	0.3047867902	0.000000078	0.0056925101	0.0309922742	0.0002035971	0.0025283391	0.0106000829	0.0083232466	0.0051185474	0.0080336399	0.0059447257	0.0096374832
g__Nitrosomonas	5.77E-13	8.22E-12	6.95E-12	0.0000481	1.62E-11	0.0000482	0.40653186	0.0016584196	6.96E-16	0.0019767161	0.000000865	0.0947065949	1.02E-08	0.1612953677	0.0000247	8.27E-10	0.5958884932	0.0004670899	1.12E-11	0.2814333059	0.0001217612	0.0033132978	0.0008333232	0.0009456874	0.0012025814	0.0022261379	0.0011026344	0.0020279433
g__A0837	0.0062386432	0.0000703	8.09E-16	3.12E-22	1.57E-12	0.000000454	0.0001094473	1.73E-15	1.13E-23	1.03E-12	0.0000064	0.163026171	0.8938019117	0.2013056923	0.0014701	0.016330808	0.0000113	1.31E-12	0.0002419945	8.16E-17	2.18E-08	0	0.00000316	0.0006154011	0.0008902249	0.0004897229	0.0002767198	0.0000561
f__Nitrosomonadaceae;g__unclassified	5.87E-10	1.85E-11	0.0144162843	0.7016643076	0.0005300135	0.3425261025	0.0068117776	4.33E-11	4.36E-16	4.69E-08	3.03E-16	3.72E-17	2.62E-21	1.05E-12	4.46E-20	0.0000825	0.0751941701	0.00000351	0.000000282	0.4136690784	1.94E-08	0.000179859	0.0000199	0.00000441	0.0001172038	0.0001863384	0.0000869	0.0001982033
f__Comamonadaceae;g__unclassified	0.0000199	6.75E-08	0.0002369665	0.0006515758	0.0000127	0.0000138	0.0249275805	0.0523440384	0.0211093147	0.7075294773	0.6749448221	0.000000587	0.000000059	0.0002654058	0.0001262187	0.2684135676	0.0032430937	0.0003727991	0.0008393063	0.0001530875	0.9584121628	0.0160564916	0.0072451896	0.0046075473	0.0087205871	0.0093604082	0.0071755737	0.0071489094
g__Comamonas	0.000000045	0.00000873	0.000000449	0.0000625	0.000000352	2.1E-15	0.0414541646	0.0215391987	0.0092179064	0.1140392236	0.0000316	0.0018063208	0.0009345961	0.0045766601	0.4687000642	0.520476462	0.4281388856	2.85E-10	0.1947655556	2.51E-10	1.84E-08	0.0000161	0.0001684799	0.0003555027	0.0000996	0.0000956	0.0001112829	0.0003822466
g__Rubrivivax	0.0005026786	0.000000736	2.44E-25	0.1794749364	NA	NA	0.0000146	2.7E-26	0.0015008561	0.0005026786	0.0005026786	5.78E-12	0.000000776	0.000000736	0.000000736	5.14E-26	2.44E-25	2.44E-25	0.1794749364	0.1794749364	NA	0	0.0000183	0.0001320927	0.0007794065	0.00000146	0	0
g__Diaphorobacter	NA	0.3355612779	NA	0.0148230975	0.00000024	NA	0.3355612779	NA	0.0148230975	0.00000024	NA	0.3355612779	0.1457705752	0.000000318	0.3355612779	0.0148230975	0.00000024	NA	0.000000933	0.0148230975	0.00000024	0	0	0.000002	0	0.0000105	0.0002600469	0
g__Variovorax	0.0304026112	7.48E-10	0.0000162	0.0004192006	0.0520539921	0.1931331509	0.0000214	0.0781696577	0.2688593206	0.8973651956	0.3418914252	0.0032546597	0.0004257533	0.0000209	0.000000107	0.4979930029	0.0652833616	0.0043399924	0.2275559536	0.0315432282	0.4321263524	0.00000411	0.0000305	0.0000948	0.0000662	0.0000536	0.0000327	0.0000193
g__Brachymonas	0.0001676161	8.11E-10	1.7E-18	0.0086069789	NA	NA	0.262233546	0.0712333607	0.0002370131	0.0001676161	0.0001676161	0.000000344	7.39E-10	8.11E-10	8.11E-10	1.36E-18	1.7E-18	1.7E-18	0.0086069789	0.0086069789	NA	0	0.0010087822	0.0008769102	0.0002026899	0.00000279	0	0
g__Ottowia	1.21E-08	3.89E-12	1.94E-32	2.74E-18	3.85E-13	0.00000985	3.13E-09	1.19E-09	0.0009054375	0.0000183	0.00000109	0.3824063006	1.41E-11	8.3E-12	1.13E-13	1.71E-31	2.87E-32	4.54E-33	0.000261038	0.00000288	0.0187138798	0.00000239	0.0013868488	0.0052267136	0.004790195	0.0004151845	0.0001999253	0.0001333395
g__Sphaerotilus	0.0007677992	0.4198210716	0.0028393481	0.0035950587	0.0003740907	0.0003740907	0.0007749903	0.0000304	0.1053202195	0.1002626853	0.1002626853	0.0107345239	0.0021782355	0.000480867	0.000480867	0.0000627	0.0000211	0.0000211	0.007680307	0.007680307	NA	0.0000467	0.00000111	0.0000701	0.0006928549	0.0000065	0	0
g__Rhizobacter	0.000174689	0.00000124	2.27E-12	9.92E-14	7.68E-10	NA	0.0031737473	0.0002614708	0.0000069	0.00000274	0.000174689	0.6292525327	0.1524096503	0.021649015	0.00000124	0.3070964046	0.044317368	2.27E-12	0.2302420054	9.92E-14	7.68E-10	0	0.0000155	0.0000395	0.0000531	0.0000617	0.0000818	0
g__Rhodoferax	1.12E-08	0.0386301617	0.2560358063	1.08E-08	0.000000126	0.0000148	0.0069611603	0.00000157	3.9E-17	1.54E-11	9.68E-15	0.2263028128	0.00000201	6.76E-09	0.000026	5.58E-10	2.07E-08	0.00000116	0.0004602121	0.0426911098	0.000048	0.0001063702	0.0000261	0.0000715	0.0001006091	0.0002274869	0.0004740219	0.0001893891
g__Acidovorax	0.0000348	0.0012741611	0.6616304971	0.00000478	0.2802753673	0.4608132675	0.0001040682	3.33E-21	2.51E-17	3.81E-13	0.00000119	3.15E-12	1.24E-15	0.000000634	0.0005428357	3.64E-09	0.0014122202	0.0918437458	8.79E-12	1.63E-09	0.7528748025	0.0003438711	0.00000559	0.0000326	0.0003059916	0.0012629531	0.0001657831	0.0002441997
g__Simplicispira	0.0000426	1.23E-09	1.61E-20	3.01E-16	3.05E-16	0.00000741	0.000000001	4.22E-21	3.58E-17	7.96E-16	0.000000227	1.16E-09	0.0000172	0.0104614759	0.4385217114	0.0234172958	0.00000072	5.22E-08	0.0068256302	0.0000681	0.0130359171	0.0006000332	0.0002269429	0.0040052417	0.0118759341	0.0087286568	0.0056429918	0.0039853558
g__Delftia	0.0763057403	0.2730551475	0.0001882896	0.0001066244	0.0006524582	0.0001393764	0.3489570814	1.26E-08	1.65E-09	0.0002069455	2.98E-08	0.0000495	0.0000224	0.0004873842	0.0000299	0.3368910952	0.3905141141	0.6796391524	0.1691972728	0.7209440195	0.2887864424	0.0002414859	0.0000849	0.0001239056	0.0000139	0.00000933	0.0000346	0.0000134
g__Hydrogenophaga	0.0000703	1.64E-08	4.65E-10	2.49E-12	0.5375386358	0.00000452	0.0000316	5.21E-08	9.95E-11	0.0349526838	0.0780388093	0.2999988068	0.0020026814	0.0019501177	0.0123483037	0.0252711345	0.0008962255	0.0006546854	0.0001355282	0.000000706	0.0133559417	0.0069130258	0.0037208771	0.0019889644	0.0018599794	0.0012182317	0.0117105835	0.0031407632
g__Limnohabitans	1.34E-08	0.0724251442	1.25E-12	5.58E-12	6.17E-13	7.42E-12	0.011327003	1.68E-11	1.26E-11	2.08E-09	1.94E-11	0.00000936	0.00000485	0.0000175	0.00000431	0.0121047179	0.1915041679	0.00206999	0.001908647	0.1618050714	0.000681785	0.0009043801	0.0002067863	0.0006374556	0.0000179	0.00000174	0.0000266	0
g__Leptothrix	0.0382827788	0.0066799862	0.9147812933	0.0666314408	0.0034133443	2.76E-09	0.0001015219	0.0156802568	0.2746966728	0.9226999405	0.0005358795	0.0032185299	0.0001169423	0.00000735	2.61E-09	0.0002189914	0.0000337	1.5E-15	0.041718508	1.25E-12	0.000000333	0.002073758	0.0031628022	0.0011898535	0.0019799864	0.0025064702	0.0030210195	0.0048695913
g__Alicycliphilus	0.3292565772	0.024014532	0.3236360839	9.49E-09	0.000000972	0.1618930578	0.0400695385	0.8177277154	1.52E-08	0.00000102	0.3045033143	0.0508951543	0.0000471	0.00000161	0.2135914005	1.85E-08	0.00000104	0.3877323671	0.00000783	0.000000203	0.00000118	0	0.000000225	0.00000375	0.000000817	0.0000302	0.0014478539	0.00000222
g__Cupriavidus	0.1722589041	0.0019824468	0.108939429	0.9312464543	0.3203932432	0.3800207674	0.9633220252	0.2715696816	0.1675249653	0.1375849606	0.1404840977	0.010214641	0.0017604269	0.0009540527	0.0010121931	0.0530304868	0.0046244751	0.0068970795	0.1865267437	0.2657833956	0.8651910204	0.00000209	0.0001972768	0.000035	0.00000747	0.00000176	0.000000319	0.000000545
g__Burkholderia	NA	NA	0.0004968226	0.0000107	0.0531671531	0.000000001	NA	0.0004968226	0.0000107	0.0531671531	0.000000001	0.0004968226	0.0000107	0.0531671531	0.000000001	0.0939326081	0.302696664	7.49E-08	0.0133894381	0.0000159	1.17E-08	0	0	0	0.00004	0.0000727	0.0000233	0.0002537969
g__Lautropia	0.2164172158	0.000000602	4.24E-09	0.000000004	2.02E-15	0.00000501	0.00000939	0.0000341	0.000016	4.7E-14	0.0025728103	0.0312422284	0.0298398778	0.0000323	0.0042884486	0.8866521213	2.6E-10	0.1411064709	7.51E-10	0.0756888684	2.1E-11	0.0000105	0.0000282	0.0001534185	0.0000838	0.0000769	0.0004088547	0.0000618
f__Alcaligenaceae;g__unclassified	0.0000977	0.000000498	3.82E-23	6.47E-28	1.47E-09	3.93E-13	0.0076534832	0.2501810679	0.0002141134	0.1051096979	0.0017018074	0.0169551554	0.5905075691	0.1141525693	0.9926222296	5.4E-10	0.3094294351	0.000347032	0.0024873409	0.4331223454	0.0391469991	0.0001382839	0.0041928009	0.0084225803	0.0042143484	0.0086451553	0.0055864035	0.0081337403
g__Candidatus Accumulibacter	4.21E-13	7.53E-12	0.00000199	0.0000619	0.000000006	0.8093809144	0.00000253	1.18E-29	7.76E-31	8.15E-17	1.35E-27	2.07E-21	1.73E-23	1.92E-11	7.01E-24	0.0041565248	0.00000922	3.77E-14	1.13E-09	2.53E-10	6.21E-18	0.3020967875	0.018877458	0.037469054	0.1497774627	0.1791882742	0.1023710249	0.2899969212
g__Propionivibrio	0.0000047	0.0000314	0.0065242821	0.0002416402	0.0003164356	0.0075818362	0.0000351	3.59E-30	6.48E-15	1.82E-11	1.91E-11	1.32E-12	0.0001626014	0.0000991	2.21E-08	2.53E-10	0.000000186	0.9659994434	0.607913799	0.000064	0.0002682879	0.0074844714	0.0001379762	0.0004896581	0.0022143243	0.00104722	0.001114453	0.0023600592
g__Ferribacterium	2.76E-14	8.74E-14	2.37E-13	1.47E-13	1.19E-14	2.58E-14	0.0030524668	0.2043195338	0.3400076297	0.0391437752	0.9400857052	1.59E-09	0.000000174	0.0000351	0.0038413114	0.7052343377	0.1411146045	0.1747076728	0.1087152463	0.2987683783	0.0342016129	0.0781858447	0.0006268893	0.0000986	0.0007076019	0.0007113762	0.0014585002	0.0006384934
g__Rhodocyclus	0.0007551222	0.0061788645	0.0025831098	0.0001475861	0.0000311	0.000963602	0.0050350482	0.0340828128	0.0001798414	0.00000128	0.7456084631	0.2489459749	0.0000111	4.18E-08	0.023412373	9.86E-08	2.33E-09	0.1495967942	0.0023632828	0.0022792967	0.0000109	0.0304591961	0.0036266441	0.0067031999	0.0057476518	0.001729942	0.0010315703	0.0042890579
f__Rhodocyclaceae;g__unclassified	0.0000101	0.0003038221	1.79E-15	3.55E-11	0.000000607	0.0002063093	0.0003246989	8.19E-25	1.39E-16	1.52E-10	0.000000257	2.21E-24	9.1E-16	7.07E-10	0.00000121	0.1645212246	0.0038215259	0.0234647967	0.1214284047	0.1836176916	0.8804461271	0.0004919884	0.0000117	0.0000567	0.0044966958	0.0038752644	0.0028288796	0.0032359772
g__Zoogloea	1.64E-15	1.66E-14	0.0001725127	4.59E-10	4.71E-08	2.87E-10	0.0427550093	0.00000213	1.28E-19	9.56E-11	1.28E-12	0.00000012	1.55E-19	6.98E-11	1.03E-12	2.46E-14	1.11E-09	5.86E-12	0.0001228201	0.000000252	0.0995245962	0.0044724123	0.0001469609	0.0000368	0.0027928936	0.0157671118	0.0445245641	0.0614007444
g__Sulfuritalea	5.61E-08	0.000000998	2.7E-15	0.0002721146	0.000000797	0.1038901815	0.000000159	6.31E-19	0.0019850643	0.188098456	2.74E-12	0.0178001543	0.000000309	5.03E-08	0.00000184	8.04E-18	1.99E-20	3.14E-14	0.0024663104	0.00000013	1.15E-08	0.0014668172	0.0006329191	0.0125391232	0.007612787	0.0009500436	0.0005687087	0.0017347795
g__Thauera	0.1310512734	0.5572403879	0.0023904107	0.0001576735	0.0001434579	0.00000607	0.1219823309	0.0054005034	2.13E-09	0.0000678	0.000000581	0.00000791	6.43E-08	0.0001071328	0.00000213	6.3E-13	0.0000319	8.97E-08	0.0013449484	0.0034050169	0.0279035452	0.0000178	0.00000629	0.00000795	0.00000186	0.0000624	0.0009196804	0.000206405
g__Dechloromonas	0.00000579	0.3275395543	0.0038312997	0.0144524036	0.0000686	0.5157806754	0.0003880875	2.03E-12	2.1E-10	2.51E-10	0.000328497	0.0003690868	0.0015823754	0.00000926	0.1960497709	0.7643798077	0.0398930044	0.1890972694	0.0283550606	0.280688471	0.0088736833	0.0113106489	0.0029866829	0.0090374237	0.0204579624	0.0198630267	0.0297599477	0.017592069
g__Denitratisoma	0.3722144743	0.00000001	0.6624976974	2.82E-11	5.04E-13	4.22E-12	1.27E-08	0.5827397816	1.15E-16	5.66E-18	2.75E-17	1.45E-08	3.81E-10	1.4E-10	2.37E-10	2.32E-22	8.24E-22	1.15E-21	0.0548138207	0.5127893834	0.2235679945	0.0006834099	0.000588239	0.0054871467	0.0006523647	0.0000395	0.0000274	0.0000356
g__Leeia	NA	NA	0.3236360839	NA	0.3286946832	NA	NA	0.3236360839	NA	0.3286946832	NA	0.3236360839	NA	0.3286946832	NA	0.3236360839	0.6073819751	0.3236360839	0.3286946832	NA	0.3286946832	0	0	0	0.000000251	0	0.000000752	0
o__SC-I-84;g__unclassified	0.0829010757	0.0005625723	6.43E-09	2.07E-21	0.00000119	0.00000114	0.0074621347	3.79E-08	2.04E-23	0.00000242	0.00000548	0.0000159	1.75E-19	0.0000355	0.0021312364	0.000000157	0.1730361715	0.0813099035	0.0083127991	4.85E-12	0.0079668869	0	0.00000119	0.00000471	0.0000586	0.0001402869	0.0000903	0.0000253
f__Hydrogenophilaceae;g__unclassified	0.0162590513	0.1648973946	9.23E-08	4E-13	3.84E-09	1.58E-09	0.687918893	0.0000138	3.29E-12	6.78E-09	3.18E-09	0.0000162	6.61E-12	4.64E-09	1.89E-09	0.0002389507	0.00000027	0.000000872	0.0000401	0.0010135483	0.0873721544	0	0.00000221	0.00000219	0.0000292	0.0000669	0.0003171302	0.0001888246
g__Bosea	0.0026336308	9.92E-11	0.000000124	0.0021787763	NA	NA	1.25E-10	0.0023020332	0.6576109036	0.0026336308	0.0026336308	0.0001353795	1.6E-09	9.92E-11	9.92E-11	0.0135679724	0.000000124	0.000000124	0.0021787763	0.0021787763	NA	0	0.0000644	0.0004988853	0.0003001206	0.0001388537	0	0
g__Bradyrhizobium	0.000209383	0.000000016	1.53E-16	2.67E-09	0.0536803043	0.0461341726	0.000000155	0.00000421	0.1877996707	0.002551616	0.0019618896	0.0039534523	0.00000132	7.63E-09	9.29E-09	0.000024	5.91E-16	3.24E-16	0.000000227	0.000000114	0.9042794048	0	0.0000252	0.0001776611	0.0000943	0.0000363	0.00000301	0.00000251
g__FukuS110	1.09E-12	2.08E-10	6.4E-24	5.51E-15	0.000096	1.82E-10	0.000012	0.1390981823	7.08E-08	3.44E-10	0.000000163	0.0000013	1.04E-08	2.19E-10	3.76E-09	7.11E-13	1.26E-12	2.89E-09	0.0036849946	0.6899326875	0.0050687787	0.0000039	0.0003444246	0.000925759	0.0002635936	0.0000714	0.0000414	0.0000828
g__Methylorosula	0.0053578629	0.000000918	2.75E-10	3.95E-10	3.95E-10	3.95E-10	0.0014904552	0.000000001	9.26E-10	9.26E-10	9.26E-10	0.0001619123	0.0000864	0.0000864	0.0000864	0.0836146124	0.0836146124	0.0836146124	NA	NA	NA	0.0001372693	0.0000735	0.0000254	0.00000129	0	0	0
g__JG35-K1-AG5	1.05E-11	0.000000004	0.0000541	0.000000344	0.0000575	0.0004428258	0.0251322912	1.3E-29	2.27E-29	1.53E-26	8.96E-08	4.72E-10	2.1E-10	5.29E-10	0.00000169	0.0002425098	0.9820345966	4.59E-11	0.0002604621	7.45E-13	6.18E-11	0.0009897653	0.0031475416	0.004199187	0.000439154	0.0002624512	0.0004251866	0.0017624534
g__Nordella	0.9784262653	0.4643907998	0.6014360418	0.0001097517	0.2418232242	0.573752857	0.4517135209	0.5842986547	0.0000878	0.2307632383	0.5576477884	0.7815631481	0.0090145713	0.8798596548	0.8258535206	0.0006291649	0.583283751	0.9541968877	0.0006705285	0.0013685467	0.6464475379	0.0001356001	0.0001378514	0.0001214454	0.0001358643	0.0000703	0.0001133951	0.0001286406
g__MNG7	0.0001293479	0.0001471044	0.0031657983	1.56E-12	5.52E-18	1.87E-14	0.8234911116	0.2753189826	3.44E-08	3.86E-15	1.81E-12	0.3438882138	1.61E-08	8.62E-15	2.46E-12	1.72E-09	6E-17	3.46E-13	0.00035105	0.00000145	0.0075355356	0.00000544	0.0000208	0.000018	0.0000195	0.0001152271	0.0001898933	0.000305742
f__B142;g__unclassified	1.54E-13	3.43E-13	1.08E-08	0.0312728871	0.7499702978	0.0135004492	0.000000402	1.52E-12	9.59E-20	2.07E-24	2.38E-23	0.000000004	2.31E-10	1.26E-11	2.65E-11	2.43E-20	3.47E-19	3.47E-31	0.0000385	6.23E-22	0.0001806071	0.0032942537	0.0392995672	0.1182488602	0.0184859127	0.0044903792	0.0020926827	0.0003803384
g__Aminobacter	0.000000005	1.17E-11	6.47E-08	0.8859843545	4.08E-17	1.39E-12	0.0000353	0.3622873509	0.00000631	1.72E-22	4.3E-15	0.2046785935	1.64E-08	3.1E-24	2.69E-16	0.0000112	2.9E-25	7.68E-19	2.73E-14	9.39E-13	0.1101582842	0.0007569807	0.0002318691	0.0001202762	0.000305641	0.0008681141	0.002841702	0.0034320388
g__Mesorhizobium	1.81E-08	2.28E-10	0.0126555103	0.0551205707	0.00000139	4.06E-09	0.00000323	8.69E-09	1.78E-10	0.0959009767	0.000000172	1.48E-08	0.000000016	0.000000432	0.0000361	0.1965762407	0.0000397	1.54E-08	0.000000926	1.15E-08	0.000000082	0.0001524247	0.0006035763	0.0017839227	0.0002594953	0.0002076093	0.0004953512	0.0078509493
g__Pseudaminobacter	0.1158764494	0.000000855	0.00000312	0.0011528073	0.6424084067	0.0094450122	0.00000923	2.01E-13	0.000000008	0.0019082106	0.1318215482	8.45E-10	7.1E-09	0.000000978	0.0000853	0.00283949	6.79E-14	4.61E-14	0.000000885	3.47E-10	0.0000381	0.0002679308	0.0003432078	0.0010060132	0.0000591	0.0001133492	0.0002195802	0.0004334709
g__Nitratireductor	3.69E-08	8.06E-10	0.7626136409	0.213335629	0.0202035446	0.0110253493	0.0000171	1.55E-09	1.46E-11	1.55E-11	3.21E-11	2.23E-09	1.72E-09	3.22E-09	4.11E-09	0.0528662737	0.0004220197	0.0001027542	0.0616026303	0.0156699868	0.3286946832	0.000009	0.000066	0.0002183333	0.0000119	0.00000452	0.000000504	0
g__Meganema	5.44E-08	1.31E-11	6.01E-18	1.7E-13	2.92E-09	0.000000028	1.39E-11	0.0546851654	0.0057671835	0.4018334154	0.0167891801	6.97E-11	2.76E-11	1.77E-11	4.43E-12	0.1453741776	0.3367879003	0.1894851753	0.0448228206	0.8286719518	0.0718651294	0.0010287307	0.0029678457	0.0501593635	0.0036516091	0.0044185258	0.0033272453	0.0046703256
g__Rhodoplanes	0.000000147	1.78E-11	0.0075147604	0.0249810075	0.0249810075	0.412209586	2.65E-08	0.0001197241	9.17E-12	9.17E-12	1.19E-11	3.83E-10	4.84E-10	4.84E-10	9.35E-11	1.14E-08	1.14E-08	0.0000382	NA	0.0242595277	0.0242595277	0.00000629	0.0000379	0.0002501361	0.0000187	0	0	0.00000302
g__Hyphomicrobium	9.17E-09	2.01E-08	0.0139151235	0.001559726	0.0000101	0.0058176757	0.0033837797	0.00000101	4.73E-11	1.53E-13	1.91E-11	0.000000249	7.43E-09	1.17E-10	2.29E-09	7.74E-10	5.46E-10	0.000000238	0.0065334325	0.9304761709	0.0132069081	0.0007809142	0.0019796797	0.0029828684	0.0010293759	0.000539094	0.0003880395	0.0005542672
g__Devosia	0.000000575	3.44E-11	0.6986657614	0.0243040935	0.0722931293	0.8585694884	0.00000035	3.63E-11	0.0000203	0.00000185	6.48E-09	2.25E-09	0.000000001	7.92E-10	2.81E-11	0.0032201101	0.0216769222	0.482883321	0.5231810711	0.0076630071	0.0294257579	0.0017482932	0.0042304644	0.0109169058	0.0017210142	0.0026384502	0.0023384345	0.0016915386
f__A0839;g__unclassified	1.87E-25	0.00000106	4.85E-12	2.51E-19	5.48E-11	3.92E-18	1.48E-10	0.3885127522	9.33E-15	0.0060165621	0.00000582	0.00000498	2.37E-18	1.38E-08	8.66E-15	2.4E-16	0.0045761038	0.0001732478	1.48E-12	5.99E-13	0.9523523621	0.0000021	0.0003505302	0.0000654	0.0003975322	0.0038375165	0.0007059869	0.0006518705
g__Neorhizobium	0.0000024	7.64E-09	0.0033828793	0.000220858	2.16E-10	0.0973179298	0.000000289	0.0004682566	0.0052418825	0.0056730434	0.0000706	5.38E-08	7.49E-08	0.0000111	2.04E-08	0.1703387057	3.11E-08	0.1939453973	0.000000277	0.0196095619	3.93E-09	0.0005460911	0.0013276854	0.0049455314	0.0007765638	0.0008815106	0.0019600945	0.0006839465
g__Shinella	8.53E-09	2.45E-12	8.34E-23	1.67E-16	6.68E-14	0.000000219	5.36E-13	1.94E-09	0.0006701313	1.86E-10	0.0000015	0.000000061	7.5E-11	0.0016884283	4.36E-12	0.0004666213	0.0033729225	6.4E-21	0.000000663	4.1E-14	4.07E-13	0.0001320294	0.0017216313	0.0119668225	0.0052489254	0.0032897149	0.0080219902	0.0003725161
g__Rhizobium	0.0000732	0.3442113396	0.0000105	0.00000151	0.00000127	0.2216864905	0.0001719539	3.05E-11	1.66E-11	1.63E-11	0.000000177	1.35E-08	1.06E-08	1.15E-08	0.004459784	0.0002101758	0.0000345	1.46E-12	0.1618152479	1.93E-13	3.74E-13	0.0002349759	0.0007009839	0.0002643755	0.0000148	0.000000899	0	0.0001343825
g__Pseudolabrys	0.0008261861	0.000000259	0.1374370871	0.0001569517	0.0001156467	0.0394217438	0.00000854	0.0244356211	1.6E-15	1.29E-15	2.29E-08	0.00000119	5.49E-08	4.87E-08	5.52E-08	8.39E-10	5.75E-10	0.0001868895	0.7527030258	0.026931065	0.019565316	0.0000211	0.0000471	0.000336041	0.000038	0.00000174	0.00000129	0.0000105
g__Variibacter	0.202567212	7.18E-09	1.82E-19	8.31E-17	6.22E-08	0.0006723417	8.54E-10	6.69E-20	2.55E-17	0.00000011	0.0071139476	0.7917037216	0.3675079034	0.0755100112	3.73E-08	0.4452469561	0.0821988267	7.29E-11	0.231924984	1.47E-09	0.0000741	0	0.00000181	0.0000723	0.0000721	0.0000634	0.0000533	0.000011
g__Phreatobacter	0.8526245411	1.27E-10	1.29E-08	1.54E-11	0.0042901735	0.0146028105	1.86E-09	6E-15	1.59E-13	0.0022460649	0.0057601913	0.000000145	0.00000364	1.93E-09	8.27E-10	0.0027236461	0.027934606	0.0004841543	0.0000853	0.00000038	0.4343505307	0.0000717	0.0000681	0.0007608884	0.0002164874	0.0003228156	0.0001598809	0.0001296096
f__Rhodobacteraceae;g__unclassified	0.2208573515	0.9625550491	0.0262590833	0.9134695049	0.3730731193	0.5002623233	0.0254716765	0.0850974967	0.0266655521	0.5622176274	0.001988258	0.00000165	0.8960029789	0.0767869838	0.1724368189	0.00000232	0.0109593276	9.5E-09	0.0783318641	0.264455299	0.0059359067	0.0026771986	0.0016942501	0.0022621644	0.0011962226	0.0024188636	0.0018500843	0.0026724497
g__Rubellimicrobium	NA	NA	NA	0.3245871275	3.45E-10	0.3281832619	NA	NA	0.3245871275	3.45E-10	0.3281832619	NA	0.3245871275	3.45E-10	0.3281832619	0.3245871275	3.45E-10	0.3281832619	3.57E-10	0.9136669492	3.51E-10	0	0	0	0	0.00000169	0.0008016745	0.00000156
g__Gemmobacter	3.32E-10	0.00000294	0.000000915	9.6E-09	0.2500444398	0.000000039	0.0003142578	0.8956088462	0.1036641138	0.0000586	0.0043286275	0.0002784947	0.0001206487	0.00000474	0.0218265675	0.343603758	0.0007535745	0.007969256	0.0011727746	0.0004800419	0.00000112	0.0002997064	0.0021341509	0.0113301839	0.0028054242	0.0017114788	0.000866591	0.0053941424
g__Rhodobacter	3.4E-11	0.1846103654	0.0005839277	0.1392829645	0.000000236	0.0000827	3.74E-13	1.07E-08	1.2E-16	0.0024187247	1.62E-19	0.00000231	0.9636493077	1.44E-09	0.0022174031	3.57E-09	0.0023184115	1.94E-14	1.08E-11	0.0000838	3.08E-15	0.0194035106	0.0403309924	0.0168949906	0.0266074267	0.0169741237	0.0329284011	0.0125507804
g__Defluviimonas	0.1123683633	4.05E-15	0.0085070107	6.55E-12	0.0046361261	0.1132707419	1.88E-13	0.3290773307	1.89E-10	0.1591564055	0.0060952196	2.58E-19	1.07E-10	4.94E-13	3.96E-18	1.35E-14	0.6059405702	0.0001718198	1.76E-10	7.61E-13	0.000216072	0.0047132404	0.0058745915	0.0004461208	0.0069362849	0.0014268565	0.0072851677	0.0040468814
g__Paracocccus	0.000137383	4.96E-13	1.01E-16	4.61E-16	1.62E-12	1.21E-17	6.49E-10	9.71E-16	7.06E-23	2.08E-09	2.38E-14	0.0000589	0.0000696	0.00000224	0.1290493799	0.8061666463	0.0940433047	0.0006600969	0.0310409363	0.0003377858	0.00000764	0.0030709576	0.0043733407	0.0137608557	0.0094352496	0.0094270378	0.0082453749	0.0121658845
g__Acidocella	0.00000848	0.0021869089	0.000000882	0.000000262	1.25E-08	2.8E-12	0.00000287	0.5356037487	3.99E-14	9.03E-11	9.37E-16	0.00000103	0.9813839804	0.0000233	0.000014	3E-16	3.64E-11	7.84E-17	0.00000567	5.22E-08	0.3227910134	0.0000465	0.0000184	0.000107382	0.0000199	0.0001033035	0.0003211984	0.0002571046
g__Roseomonas	0.3757784212	0.3170625392	0.0294242556	0.520454544	1.98E-11	0.9613248548	0.0673246619	0.0460508445	0.0482823637	5.29E-12	0.3822989164	0.0060157901	0.5630445901	0.000000002	0.2862504589	0.0001528644	1.98E-12	0.0228768665	3.26E-11	0.4658019082	8.59E-12	0.0000121	0.00000576	0.0000197	0.00000349	0.0000147	0.0001932973	0.0000132
f__DA111;g__unclassified	0.0000285	0.0112365095	4.56E-09	0.8521672461	0.0626636228	3.21E-15	0.0206248814	0.4000403546	0.00000683	0.06675834	4.95E-11	0.0002083468	0.0032016286	0.9972683731	2.9E-13	2.59E-14	0.0071902693	1.18E-10	0.0388914706	7.02E-15	2.48E-12	0.0000106	0.0000683	0.000027	0.0000746	0.0000103	0.0000477	0.0004340169
f__Rhodospirillaceae;g__unclassified	0.0000186	1.28E-09	2.62E-32	9.13E-12	8.13E-10	3.84E-12	1.17E-09	6.84E-17	2.98E-10	8.32E-09	1.27E-11	0.000024	0.9244383212	0.6199595879	0.0011233709	0.0001422502	0.0006718759	4.31E-08	0.615769054	0.0040841803	0.0007957738	0.0000494	0.0004170268	0.0079394586	0.0029369444	0.0098020416	0.0078971018	0.0167954386
g__Dongia	6.01E-10	6.79E-12	1.16E-10	2.42E-11	2.43E-15	0.0202141129	0.0039962079	0.0252080974	0.2027525237	6.23E-09	6.22E-10	0.1114837454	0.0917975238	0.0006720079	1.1E-11	0.6519351027	0.000000407	1.39E-10	0.000000879	8.18E-11	5.54E-14	0.0016604641	0.0004944853	0.0003216356	0.0004010381	0.0004490273	0.0001516498	0.0024201946
f__B79;g__unclassified	0.00000696	0.1150931794	6.55E-09	0.00000811	3.45E-10	1.37E-10	0.0640736115	0.273103551	0.8276834242	1.95E-15	6.79E-14	0.0106589338	0.0874488913	8.91E-08	8.01E-11	0.1828402484	4.82E-18	3.01E-14	2.25E-16	5.89E-14	0.0005342214	0.0000667	0.0000223	0.0000501	0.0000181	0.0000285	0.0002326968	0.0004304895
g__Reyranella	0.4981331577	7E-13	0.0013319719	6.67E-08	0.0233242908	0.0000125	2.74E-12	0.0017427807	3.33E-09	0.0015706231	0.0000176	6.45E-13	1.51E-13	2.79E-12	6.49E-15	0.0003092534	0.000000136	0.0214350229	1.81E-12	0.5699398822	7.44E-09	0.0000594	0.0000514	0.0010443631	0.0000319	0.0000136	0.0000898	0.0000193
f__I-10;g__unclassified	5.68E-12	1.32E-11	6.47E-12	2.87E-09	4.45E-10	0.8139095034	0.763160709	0.6964469115	0.0001058158	0.0259041331	7.24E-12	0.549423805	0.0007961619	0.033244901	1.43E-11	0.0002512181	0.048374967	9.89E-12	0.2108244042	0.000000009	1.05E-09	0.0002335732	0.0000126	0.0000137	0.0000181	0.0000516	0.0000363	0.0002554342
f__Hyphomonadaceae;g__unclassified	0.0003589952	0.3897377298	0.7259161612	2.78E-09	1.34E-14	5.2E-09	0.00000139	0.0002149059	1.14E-08	4.14E-17	1.29E-12	0.1886874924	2.32E-12	8.81E-18	1.51E-08	3.42E-13	1.45E-21	5.7E-10	1.35E-10	2.77E-15	4.43E-19	0.0060807935	0.0035264825	0.0066037278	0.0060260206	0.0015734827	0.0002704114	0.0163693782
g__Hirschia	5.74E-08	0.000015	0.236443377	0.3815684494	0.0785421313	0.0912353656	0.0002787545	2.15E-26	9.09E-24	6.22E-13	0.000000161	2.36E-11	8.68E-11	7.09E-10	0.0010603194	0.5947857584	0.2911285701	0.0009460372	0.1592687075	0.0025244507	0.0004041705	0.0001375292	0.00000284	0.0000217	0.0001621718	0.0001518169	0.0001983268	0.0000905
g__Brevundimonas	0.000000771	0.00000333	6.67E-12	0.00000081	1.08E-08	0.0001734367	0.0052132901	0.0005038823	0.0439169956	0.0008303408	0.0217709496	0.8801657954	0.4068091276	0.8892501797	0.5446827859	0.4251956688	0.7433559177	0.4674484777	0.3050050948	0.253902994	0.5925285468	0.0001589503	0.0005231665	0.0010583793	0.0010790659	0.0010119272	0.001107299	0.0017363377
g__Novosphingobium	0.8582366635	2.53E-11	0.000000489	0.00000477	0.00000144	6.48E-14	4.91E-20	3.31E-10	2.09E-08	0.000000406	1.57E-18	1.68E-08	7.85E-09	0.0092266299	0.2920350512	0.5654706331	0.1890378162	8.02E-08	0.086853778	1.79E-08	0.0042221479	0.005620295	0.0056099096	0.0005201558	0.0024913047	0.0027250239	0.0019771441	0.0005535364
g__Sphingosinicella	0.0006097642	9.31E-08	0.9187571316	0.0589235828	0.4013665247	2.28E-15	0.0004691165	0.0000349	0.000000206	0.0175654279	5.65E-16	6.47E-09	6.1E-11	0.00000289	2.98E-17	0.0391894171	0.3082941352	6.7E-15	0.011780912	8E-15	4.51E-16	0.0005539211	0.0003587715	0.000202916	0.0005639441	0.0006933281	0.0005098531	0.0051975056
g__Sphingopyxis	0.00000031	0.8144185602	1.63E-17	1.06E-19	0.0003545923	0.1375745291	0.0001574492	0.0000452	4.7E-12	0.7270599078	0.00000519	0.00000003	2.95E-10	0.001578324	0.4893181846	6.63E-13	0.027546403	7.04E-19	0.00000327	1.75E-26	0.0018563139	0.0032001969	0.0016248932	0.0031882847	0.0008008346	0.0001269954	0.001789761	0.0028632747
g__Sphingomonas	0.000000165	3.58E-11	5.8E-16	0.000000234	5.05E-10	0.0021241367	0.0120204016	0.0049037655	0.0000178	0.0000189	0.00000172	0.4260139152	0.000000849	0.000000146	3.52E-09	0.000000163	9.06E-08	3.05E-12	5.23E-09	0.0045411608	1.68E-09	0.0000198	0.000803207	0.0003093672	0.0002906354	0.0001085062	0.003117778	0.0000536
f__Sphingomonadaceae;g__unclassified	0.0000116	0.0000056	0.2535180761	0.5324346903	1.16E-16	4.37E-12	0.5874990827	0.0001236654	0.00000909	1.82E-17	1.37E-12	0.0000447	0.00000412	1.43E-17	1.24E-12	0.1127005666	1.38E-18	2.83E-12	3.59E-17	3.86E-12	0.000000019	0.0000508	0.00000464	0.00000296	0.0000498	0.0000921	0.0008472644	0.0051324447
f__Ellin6055;g__unclassified	0.0000126	0.0180770143	7.98E-11	3.01E-20	2.05E-13	2.64E-09	0.0910942575	0.00000545	1.95E-16	2.05E-12	0.0018998718	0.000000469	1.66E-15	4.4E-13	0.0001777915	0.0000111	1.27E-11	0.0055280063	2.22E-09	6.06E-13	6.32E-12	0.00000685	0.0000282	0.0000186	0.0001299053	0.0002595193	0.0014921416	0.0000547
o__DB1-14;g__unclassified	0.0002462683	1.06E-08	1.34E-11	2.42E-11	0.0190116354	1.68E-10	0.0004900337	0.000000005	0.00000333	0.5105937356	3.96E-14	0.0022750788	0.4955856081	0.0007769863	2.16E-16	0.00000432	0.000000571	6.54E-16	0.0000707	3.32E-16	3.87E-12	0.0095274853	0.0055083309	0.0025019974	0.0009499762	0.0021090575	0.0068333153	0.0289460582
o__Rickettsiales;g__unclassified	0.3292565772	0.0096652517	0.1600156475	NA	0.0164183931	NA	0.0115851443	0.4185049743	0.3292565772	0.0170950894	0.3292565772	0.0161619865	0.0096652517	0.0628223268	0.0096652517	0.1600156475	0.018374908	0.1600156475	0.0164183931	NA	0.0164183931	0	0.000000113	0.0000147	0.000000807	0	0.0004516264	0
f__SM2D12;g__unclassified	0.0022805504	0.0343165402	0.921685289	0.4618987188	0.9575777717	0.0000187	0.00000675	0.0007865633	0.0111121471	0.0874506013	0.00000441	0.0320414111	0.0050240655	0.2589618877	0.0000534	0.3775929952	0.996787363	0.0000195	0.6643892679	0.0000135	0.0000215	0.000450994	0.0002531826	0.0006316939	0.0004799028	0.000420563	0.0006315849	0.0070433985
g__Candidatus Odyssella	1.24E-18	3.48E-13	0.0000235	0.000000225	0.5735148332	0.3641767704	5.24E-10	7.5E-21	1.44E-17	1.15E-21	3.36E-18	9.21E-15	1.63E-15	8.68E-15	4.66E-13	0.0410308742	0.001388847	0.00000363	0.00000566	6.39E-08	0.2806577513	0.0000646	0.0056781823	0.0181301446	0.0005059022	0.0009044231	0.0001483598	0.0000492
g__Phaselicystis	1.36E-10	0.0126718461	1.61E-10	0.00000972	0.0087042744	0.000000248	0.0013481597	0.0920312573	2.44E-16	3.76E-12	1.48E-16	0.0034654757	0.7774871171	0.000106961	0.000000347	8.88E-14	5.31E-12	6.53E-17	3.12E-08	1.07E-13	0.0078765748	0.0004541383	0.00000821	0.0002432399	0.0000242	0.0001547932	0.0008033529	0.0012028455
f__P3OB-42;g__unclassified	6.76E-18	1.85E-15	0.00000114	2.36E-11	1.4E-16	6.64E-08	0.0000337	1.79E-13	2.29E-17	0.0000516	0.0000301	2.12E-08	1.81E-08	0.8038475494	0.0149864738	0.0733401645	9.68E-09	0.0292469075	2.81E-09	0.2574071158	0.0111957563	0.001354642	0.0000309	0.0001206761	0.0007046403	0.0004447763	0.0001224417	0.0004274108
g__mle1-27	0.0646932877	0.000000016	0.3189390305	1.23E-15	0.0000015	0.3476538084	8.53E-11	0.7791764484	4.65E-20	0.000000645	0.0081134829	0.0000131	3.67E-24	4.71E-08	1.74E-09	6.35E-16	0.000000667	0.0901172991	0.0032163142	6.4E-14	0.00000266	0.0000488	0.0000289	0.00000124	0.0000631	0.000344516	0.0011756609	0.0000674
f__mle1-27;g__unclassified	0.0006172839	0.0000159	0.0100737888	0.0193652523	0.1951189594	0.2183241854	0.0269165749	0.2562796024	4.49E-11	0.0008553639	0.0078855229	0.0047198922	8.76E-10	0.0000386	0.0001473539	3.61E-08	0.0576914055	0.1240058976	0.0000102	0.0001107499	0.9301735245	0.000688541	0.0002972543	0.0001793508	0.0004234462	0.0010194982	0.0005180042	0.000539958
g__Nannocystis	5.18E-12	5.16E-12	4.74E-12	5.16E-12	5.16E-12	5.16E-12	0.00000883	0.0000191	0.00000883	0.00000883	0.00000883	0.3236360839	NA	NA	NA	0.3236360839	0.3236360839	0.3236360839	NA	NA	NA	0.001382288	0.0000109	0	0.000000904	0	0	0
g__Sorangium	0.0968237877	1.68E-09	2.25E-09	1.22E-09	0.000000483	1.21E-09	2.52E-08	9.21E-08	1.54E-08	0.0001103513	1.21E-08	0.0124185852	0.1588613197	2.64E-11	0.0063664632	0.0009100169	7.87E-09	0.0000618	5.05E-12	0.1729719596	9.8E-12	0.0027254197	0.0019453627	0.0000103	0.0000902	0.0000115	0.0004035516	0.00000153
g__Haliangium	0.0348387507	0.14725865	0.0002421331	3.98E-11	0.2981401301	2.9E-09	0.183256667	0.1780868795	5.48E-10	0.0101681135	0.000000112	0.0025159543	1.29E-10	0.0401562043	1.36E-08	4.36E-09	0.0001214905	0.00000165	9.22E-12	0.0038244471	4.45E-10	0.0000976	0.0002460013	0.0001259717	0.0004004751	0.0036381561	0.0001069695	0.0015685864
g__Sandaracinus	6.07E-15	7.78E-11	0.0013968425	0.0881725628	0.5880678117	0.0084545146	0.0008704	5.58E-14	1.51E-18	1.18E-13	7.67E-12	1.88E-11	1.33E-13	1.14E-09	0.000000317	0.0343790017	0.0006863865	0.00000807	0.0407137173	0.000129186	0.0492163247	0.0002121711	0.0000129	0.0000359	0.0004876631	0.0002853226	0.0002025546	0.0001457536
g__Bdellovibrio	0.9546024598	1.21E-11	0.000000383	0.0051944629	0.7393431247	0.9025510551	1.27E-12	1.91E-09	0.0033664902	0.691248808	0.9228342125	0.0002524686	0.0179068998	1.42E-13	8.05E-13	0.73725769	2.35E-09	0.000000117	0.0025886938	0.0042630332	0.8463002026	0.0020732492	0.0019880873	0.0065794189	0.0047375333	0.005434076	0.001941745	0.0020697794
g__OM27 clade	NA	NA	NA	0.0928502789	0.00000615	0.1668319859	NA	NA	0.0928502789	0.00000615	0.1668319859	NA	0.0928502789	0.00000615	0.1668319859	0.0928502789	0.00000615	0.1668319859	0.00000756	0.9369643743	0.00000766	0	0	0	0	0.00000135	0.000756823	0.00000154
g__Peredibacter	0.0651642876	0.0073164596	0.000658721	0.3052312074	0.0042541251	0.1238462392	0.000000155	4.85E-09	0.2297770873	0.1004569189	0.6997319616	0.0518960662	0.000000293	0.00000061	0.000000593	1.01E-10	9.16E-08	1.12E-08	0.0124390228	0.4374833606	0.056577521	0.0000752	0.0001176708	0.00000896	0.00000383	0.0000924	0.0002230652	0.0001100885
o__Oligoflexales;g__unclassified	0.0066450325	1.39E-09	0.0000029	2.56E-12	0.0009414214	0.00000604	0.000000313	0.0002950664	7.94E-10	0.0209401081	0.0006568537	0.7588375506	0.0092992246	0.488373179	0.6526583632	0.1189440243	0.4332170154	0.5579192349	0.0252825208	0.0161157848	0.756566217	0.0001138086	0.0001830641	0.0004279132	0.0005833695	0.0006750246	0.0004536476	0.0004397638
g__32C6	3.55E-14	4.03E-14	0.0011308171	1.06E-09	0.0219357256	4.51E-11	0.2835983569	0.0113155251	1.83E-14	0.00000122	1.04E-12	0.0033451926	1.27E-14	0.00000026	9.37E-13	1.2E-12	0.1390873328	6.18E-13	2.96E-11	0.00000104	6.56E-12	0.0000644	0.00000295	0.000000986	0.0000591	0.0005557932	0.0000449	0.0018149303
g__Desulfarculus	0.0248144066	0.00000345	0.0012595031	NA	NA	NA	0.00000546	0.42743126	0.0248144066	0.0248144066	0.0248144066	0.00000758	0.00000345	0.00000345	0.00000345	0.0012595031	0.0012595031	0.0012595031	NA	NA	NA	0	0.00000296	0.0002270262	0.00000602	0	0	0
f__Desulfobulbaceae;g__unclassified	0.00000276	3.46E-08	4.99E-13	0.5909916692	0.0075029289	5.94E-09	0.000000558	0.0002874334	0.00000511	0.0002144952	0.0445870856	0.000108148	3.84E-08	6.42E-08	0.00000698	8.71E-13	4.56E-11	0.0688313863	0.0240845982	9.5E-09	0.000000237	0.0000123	0.0002155023	0.001800376	0.0006293136	0.000021	0.0000418	0.0003742284
c__TA18;g__unclassified	0.000000239	0.3281853419	2.44E-08	8.72E-11	0.000000138	0.1310735672	0.003570738	0.269073127	0.000000208	0.2975085614	0.000000119	0.0012208395	0.0000303	0.0012824325	0.0435888616	0.0005691859	0.8872636889	1.92E-08	0.0094421249	1.55E-10	3.48E-08	0.0005358547	0.0001315469	0.0004604702	0.0001344408	0.0000416	0.0001289603	0.0007804045
g__Arcobacter	0.0054046471	0.004085871	0.0102611261	0.0134441513	0.013235647	0.2647702085	0.1704078795	0.1816813411	0.0360501389	0.1017469867	0.004741763	0.0367288125	0.0032888492	0.0249394439	0.0027302538	0.6021026904	0.6963796585	0.0165861731	0.9399321961	0.026020331	0.0265207392	0.0000813	0.000000531	0	0.00000465	0.00000385	0.00000382	0.0000358
p__Candidate division SR1;g__unclassified	0.0726385574	0.0004518709	0.0159109685	NA	0.0165113256	0.3281832619	0.001438283	0.3425649631	0.0726385574	0.0634264087	0.1108680164	0.0007460752	0.0004518709	0.1947756246	0.0005053978	0.0159109685	0.0297289605	0.0977033011	0.0165113256	0.3281832619	0.018975133	0	0.0000228	0.0003301382	0.00000511	0	0.0002915779	0.000000886
g__Christensenellaceae R-7 group	0.00000115	0.000000175	0.00000571	0.1317839455	0.0005697716	0.0081774524	0.00000444	0.1572443243	0.0000204	0.1833258168	0.0110190299	0.00000163	0.000000307	0.00000108	0.000000467	0.0003043957	0.9021198009	0.1553490681	0.0068940719	0.0904963542	0.2675683014	0.00000269	0.0000365	0.0003625149	0.0000278	0.00000683	0.0000272	0.0000172
g__Acidaminobacter	0.000000107	0.0225485569	0.00000625	0.0000802	0.0001034283	0.6684403986	0.0000109	0.7639218367	0.0002485622	0.0030839849	0.000000181	0.0002558044	0.1158785924	0.0351949152	0.0355662496	0.0026957173	0.0121874224	0.00000896	0.4252845484	0.0001057604	0.0001599541	0.00000302	0.0000943	0.0000101	0.0001818274	0.0000256	0.000033	0.00000314
g__Desulfurispora	0.0011480577	0.0000171	0.0001389563	0.3245871275	NA	0.0051794543	0.0000996	0.6930325875	0.001609848	0.0011480577	0.1533539481	0.0000781	0.0000181	0.0000171	0.0000413	0.0002576566	0.0001389563	0.2262455354	0.3245871275	0.0089702188	0.0051794543	0	0.0000181	0.0003102443	0.0000177	0.000000313	0	0.00000721
f__Veillonellaceae;g__unclassified	0.0004766824	0.000000772	0.0072590864	0.0006855073	0.0002999769	0.002305836	0.00000271	0.0324538623	0.252495067	0.6355986931	0.1799139064	0.00000117	0.00000169	0.00000358	0.0000168	0.2256156044	0.0140530941	0.0149242291	0.1170199162	0.0486894879	0.3042987667	0	0.00000825	0.0001981856	0.00000324	0.00000552	0.0000112	0.0000348
g__Lactococcus	0.0000802	0.3355612779	0.0126995429	1.15E-15	1.31E-11	0.1663983562	0.0002327427	0.0015369615	0.0000221	8.88E-11	0.000403742	0.1884146116	5.23E-16	9.65E-12	0.7026397683	1.69E-15	1.38E-11	0.3591761637	0.000000072	4.77E-16	1E-11	0	0.000014	0.000000586	0.00000256	0.0000441	0.0002580347	0.00000121
p__Armatimonadetes;g__unclassified	2.85E-08	0.9968746481	2.12E-13	2.92E-08	3.76E-10	0.0001155815	0.000000571	1.31E-10	0.709019741	0.0630287488	0.0003105334	1.07E-10	0.000000918	1.38E-08	0.0005588302	3.22E-17	0.000000505	3E-19	0.0185748166	0.0001461027	0.00000108	0.0008731219	0.0002744193	0.0008743621	0.0000276	0.0002918092	0.0001916181	0.0004775207
f__SJA-28;g__unclassified	3.55E-08	0.1171139429	3.32E-12	0.0000105	0.2606909035	3.58E-11	0.000000432	0.058182691	0.000112295	0.0000194	0.0010708446	5.09E-08	0.0046458543	0.8221307862	1.28E-10	0.0008638696	0.0003567085	0.00000194	0.1041422424	6.06E-09	0.000000001	0.0033012389	0.0131469265	0.0041504441	0.0097682114	0.0065286248	0.0052265772	0.0230240802
g__K2-30-37	8.35E-08	0.0373184828	0.691204868	0.285100079	0.1390080036	0.00000732	2.96E-11	5.02E-10	1.21E-10	3.83E-11	7.03E-15	0.0220964957	0.1039702232	0.3257947818	0.0005161201	0.3147126199	0.1151246877	2.35E-10	0.4747877358	3.05E-09	0.000000788	0.0003923191	0.0012621655	0.0002162157	0.0003525209	0.0002965293	0.0002646556	0.0000781
f__OPB56;g__unclassified	1.67E-12	0.1808332049	2.27E-09	7.78E-19	0.1056976905	1.13E-14	0.0002885203	1.99E-19	1.06E-26	1.94E-12	4.44E-18	0.081292617	0.0001199378	0.4376914209	5.78E-09	0.00000054	0.00000156	2.4E-12	9.55E-17	0.000000308	4.63E-15	0.0017747151	0.0003658683	0.0033733014	0.0047802838	0.0083928579	0.0022255658	0.0167036261
f__Chlorobiaceae;g__unclassified	0.0000459	0.000506187	6.29E-13	1.59E-09	0.0013056228	1.35E-08	0.9466392285	0.000000498	0.0000154	0.027587799	0.00000389	0.00000302	0.0000338	0.0426774086	0.00000663	0.8747994331	1.03E-10	0.2480632635	7.47E-08	0.3623275819	0.000000113	0	0.0000314	0.0000303	0.0002005384	0.0002338559	0.00001	0.0002759993
g__Ignavibacterium	6.3E-09	0.0003969815	0.2641481049	0.0017417679	0.0233074418	0.0001235101	0.0001999848	5.96E-10	0.000000233	4.62E-10	0.5184701946	0.0000825	0.0310828331	0.0000194	0.0365175902	0.0005708308	0.4869858308	0.0000456	0.00000165	0.001576286	0.0000209	0.0001200687	0.0009980119	0.0003862241	0.0001347944	0.0002253861	0.0000772	0.0010349429
g__Blastocatella	3.93E-10	0.1508322985	0.0000679	0.0000119	7.59E-09	1.91E-12	0.00000504	6.43E-15	0.4627795087	0.000000277	0.000000165	0.00000664	0.0012294028	1.37E-08	1.89E-11	1.77E-10	5.14E-10	9.2E-17	0.000000137	0.000000106	0.0001080674	0.0001587488	0.000475807	0.0002138764	0.000096	0.0004832076	0.0042052119	0.0012889896
g__SBRFL126	0.3323800996	2.43E-09	0.0216599465	3.62E-09	6.63E-08	0.9688532958	1.88E-10	0.1109211135	3.51E-10	3.79E-08	0.3036105711	0.00000118	0.4470784469	8.63E-10	6.46E-11	0.00000632	1.06E-08	0.017883096	0.000000001	1.18E-10	6.85E-08	0.0000515	0.0000412	0.0000014	0.0000389	0.00000422	0.0008777765	0.0000536
c__Acidobacteria;o__Subgroup 6;g__unclassified	0.0063382623	0.2739038497	0.000038	0.6464559783	0.5005326555	0.022107015	0.0938960195	0.2157645792	0.0015539543	0.0090016379	0.9343665833	0.0031917477	0.1249395166	0.1552624219	0.1660849906	0.00000236	0.000458571	0.2490436557	0.7060919442	0.0082966789	0.0183648907	0.0004255022	0.0006258023	0.0004917784	0.0007319773	0.0004129082	0.0004182868	0.0006380248
g__Bryobacter	0.0127240956	8.98E-08	0.0022500503	4.53E-08	8.81E-09	0.0001692599	0.0000205	0.3654557088	0.00000673	0.00000258	0.1146502539	0.0014297801	0.9382769311	0.225860748	0.0002011857	0.0009687475	0.0001558964	0.7259322727	0.1805851521	0.0000256	0.0000282	0.0001763919	0.000105926	0.00003	0.0001064893	0.0000346	0.0000281	0.0000745
f__SJA-149;g__unclassified	3.48E-10	0.0004009055	3.72E-09	2.88E-08	0.000000326	0.0054624256	0.0002824624	0.1617824086	0.0136830615	0.0134416361	0.000000341	0.0021367191	0.0105981308	0.0760278684	0.2186629004	0.1839100578	0.1102954689	0.00000314	0.4415390641	0.0000306	0.0016521029	0.0006499126	0.000103757	0.0003078399	0.0001385665	0.0001597545	0.0002050756	0.0004067105
f__Holophagaceae;g__unclassified	0.0083419342	1.02E-11	4.32E-09	0.00000348	0.0000351	0.0007120535	1.51E-09	3.95E-08	0.0006372932	3.68E-11	0.136584192	0.000000744	4.11E-08	7.29E-14	1.85E-09	0.1372834026	8.82E-19	0.0000929	3.57E-14	0.0350074345	7.08E-12	0.0002697808	0.000409288	0.0019543141	0.0008749221	0.0007416682	0.0000789	0.0005107615
g__Geothrix	9.97E-08	0.00000234	6.35E-25	0.0000081	0.0230637832	0.000437159	0.0003437515	4.61E-14	0.7684783111	0.0000131	0.3406461833	0.485799064	0.0007778276	0.00000419	0.0139633285	2.14E-09	9.37E-25	0.0003163223	0.0004442648	0.4912424324	0.0028448695	0	0.0000315	0.0001826364	0.0001932042	0.0000604	0.00000554	0.0000986
c__Acidobacteria;o__Subgroup 7;g__unclassified	0.0037509542	5.88E-08	0.00000269	NA	NA	0.1673664831	7.33E-08	0.0078857861	0.0037509542	0.0037509542	0.1010533275	0.000000209	5.88E-08	5.88E-08	4.94E-08	0.00000269	0.00000269	0.0001010987	NA	0.1673664831	0.1673664831	0	0.00000412	0.0002957674	0.0000204	0	0	0.00000203
g__Nitrospira	1.57E-10	1.59E-16	7.35E-16	9.9E-16	1.15E-15	1.02E-15	3.26E-09	7.24E-08	7.15E-11	1.55E-10	1.33E-10	0.0002408426	0.000000074	0.00000108	0.000000611	8.94E-20	1.11E-17	4.09E-18	0.0000941	0.0009847074	0.5439406772	0.0232725198	0.0073436854	0.0004897222	0.0010598811	0.000025	0.000065	0.000058
c__Fibrobacteria;g__unclassified	0.0066841959	0.8675512406	0.0000635	0.000000117	1.35E-09	0.000000757	0.0264561211	3.86E-09	2.32E-15	1.34E-11	1.79E-08	0.0007024089	0.0000285	0.00000014	0.00000368	0.4888826395	0.0056643633	0.019985256	0.0082029249	0.0375412141	0.8885785675	0.0000115	0.000000378	0.0000158	0.0000805	0.0000709	0.0001243288	0.0001487471
g__Dictyoglomus	1.62E-21	8.3E-13	0.0000214	0.0426218032	0.0426218032	0.0426218032	0.000000001	3.04E-20	1.58E-17	1.58E-17	1.58E-17	7.9E-13	5.14E-12	5.14E-12	5.14E-12	4.92E-09	4.92E-09	4.92E-09	NA	NA	NA	0.00000265	0.0001886396	0.000949653	0.000021	0	0	0
g__Victivallis	0.164087868	0.00000387	0.089260705	0.005069078	0.0006190567	0.0758765982	0.000000019	0.0000451	0.0018309682	0.00000255	0.4320667799	0.0000473	2.3E-09	6.09E-09	4.57E-09	8.91E-09	1.22E-10	0.0000117	0.0095615615	0.0432785254	0.0002549137	0.000042	0.0000131	0.0001860502	0.0000759	0.00000558	0	0.0000126
p__Gracilibacteria;g__unclassified	0.0129723876	0.0000061	0.00000039	0.00000301	0.00000182	9.8E-09	0.0001675438	0.0118167023	0.0000675	0.00000407	2.53E-08	0.0364116404	0.0682865924	0.0000506	0.00000145	0.0026098526	0.0000137	0.00000017	0.0005204178	0.000131213	0.3316690061	0	0.0000106	0.0000527	0.0000333	0.0002183535	0.0012877624	0.000748683
o__Gaiellales;g__unclassified	0.1044384996	0.1652375053	0.0000157	5.58E-10	4.05E-09	0.0099187713	0.6496582091	0.0000733	4.28E-09	4.79E-09	0.0238825317	0.0000426	1.84E-09	4.54E-09	0.0177202667	0.8599080386	0.000000037	0.3016193446	5.39E-08	0.1777743458	1.24E-08	0	0.00000128	0.000000497	0.0000569	0.0000349	0.0012823724	0.0000381
g__LF_BF07	0.000088	0.0000496	0.0010057686	0.2961963068	0.2443989837	0.0071568591	0.3477838193	0.4620847374	0.0000282	9.5E-09	1.9E-10	0.1491398458	0.0000886	0.000000253	3.33E-09	0.0021715326	0.000000831	4.78E-09	0.0072259974	0.0000325	0.0466662594	0.0000325	0.0000788	0.0000934	0.0000787	0.0000409	0.0000212	0.0000138
g__K2-78	0.4895767969	6.01E-10	0.6444697231	0.0000169	0.0000163	0.0000616	3.36E-09	0.1089902399	1.5E-14	2.49E-14	9.35E-12	1.26E-09	6E-10	5.54E-10	4.74E-10	1.8E-09	2.71E-09	0.000000285	0.9818342072	0.3209530666	0.3347838873	0.0000233	0.0000228	0.0009095684	0.0000212	0.0000011	0.000000991	0.00000253
g__Propioniciclava	6.61E-14	0.0000961	2.05E-10	2.08E-11	4.11E-09	0.000027	5.48E-15	1.79E-12	9.9E-11	3.08E-16	6.71E-35	1.93E-09	4.59E-10	0.00000224	1.05E-12	0.4984495174	0.00000229	3.13E-41	0.0008443781	1.64E-32	8.82E-27	0.019615009	0.1822491338	0.0468062441	0.1161281279	0.1137043907	0.0856074038	0.0014139331
g__Micropruina	3.65E-18	3.73E-15	4.12E-25	6.65E-17	4.54E-12	0.7691522169	4.78E-11	2.75E-14	0.6704430002	0.0022944607	3.47E-18	0.5647595165	8.64E-12	0.00000196	1.34E-13	3.58E-13	0.0000105	4.06E-24	0.0082734812	5.63E-17	1.06E-11	0.0002677257	0.0108343196	0.0480849962	0.047477335	0.0126817912	0.0221537976	0.0001341311
g__Propionicimonas	4.54E-17	3.43E-12	1.05E-21	1.98E-15	2.44E-09	0.6969252612	0.0195305765	0.000000107	0.000000106	1.54E-19	1.34E-24	0.7719907475	0.0000744	3.58E-08	1.63E-11	3.12E-17	9.51E-28	6.37E-32	3.57E-13	2.71E-22	2.96E-12	0.0027288118	0.082109077	0.1186306964	0.1202009802	0.054819769	0.0206020738	0.0027755426
g__sbr-gs28	1.41E-11	9.11E-09	6.61E-25	7.24E-29	1.54E-17	0.0055376287	1.34E-09	0.0000265	0.0056186841	0.4635976772	3.48E-11	6.06E-14	1.03E-28	2.41E-17	0.0937515389	2.26E-23	1.16E-11	1.35E-08	0.0013100033	7.23E-20	1.05E-16	0.000028	0.079057051	0.0057235661	0.0280870584	0.1120076889	0.0830313491	0.0064513445
g__Microlunatus	0.00000187	0.0001601446	1.06E-27	1.1E-23	0.000000417	1.7E-11	0.220727643	1.26E-10	9.85E-18	0.00000175	0.0037931472	6.88E-11	1.9E-17	0.00000119	0.0000812	4.46E-09	0.0000206	0.000000141	0.0001341006	1E-15	0.00000444	0	0.0000276	0.0000154	0.0001330788	0.0002809647	0.003015593	0.000056
f__Propionibacteriaceae;g__unclassified	1.94E-09	0.0002405254	1.38E-16	3.63E-32	6.34E-15	0.1023205022	0.00000113	0.000002	1.38E-22	8.25E-13	5.06E-09	2.39E-14	1.77E-31	1.65E-15	0.0295191792	1.57E-14	0.00000243	1.47E-16	0.008158028	5.55E-39	1.51E-16	0	0.0000777	0.00000946	0.0002736365	0.0007758592	0.0005994168	0.00000651
g__Tessaracoccus	NA	0.1653256315	NA	0.3245871275	0.0067525784	NA	0.1653256315	NA	0.3245871275	0.0067525784	NA	0.1653256315	0.473716848	0.0073988044	0.1653256315	0.3245871275	0.0067525784	NA	0.0070156818	0.3245871275	0.0067525784	0	0	0.000000171	0	0.000000145	0.0004716714	0
g__Nocardioides	0.0006907383	2.15E-09	1.66E-25	4.32E-22	1.33E-12	0.0002492039	0.000000125	1.87E-19	1.17E-18	2.08E-12	0.868561075	3.99E-10	1.44E-09	0.000000821	0.000000128	0.9187425261	0.6088433735	2.62E-20	0.5668558614	2.83E-19	2.5E-12	0	0.0006613506	0.0033244546	0.0109318248	0.0108242827	0.0122733397	0.000711184
g__Arcanobacterium	0.7318640485	0.9816045675	0.0397201644	0.0059760701	2.31E-08	0.9892179044	0.5672572612	0.0102764713	0.0033792789	4.16E-08	0.6638466236	0.0045215124	0.0019195555	3.31E-08	0.9916520307	0.163639152	0.000000144	0.0135026231	0.000000597	0.0029961573	2.81E-08	0.0000445	0.0000198	0.0000152	0.0001011541	0.0002585525	0.002597798	0.0000338
f__Actinomycetaceae;g__unclassified	0.000000318	9.01E-08	1.2E-26	4.91E-10	3.46E-11	0.485216593	0.0829701017	1.14E-23	0.00000194	9.34E-10	0.000000364	7.02E-21	0.0000435	3.5E-09	0.000000535	0.000000177	0.8727332752	1.1E-24	0.0000617	0.000000001	7.11E-11	0.0000369	0.0003622368	0.0005548993	0.007981583	0.0033018366	0.0087686826	0.0000202
g__Humibacter	NA	NA	NA	1.29E-08	0.0014054219	0.3281832619	NA	NA	1.29E-08	0.0014054219	0.3281832619	NA	1.29E-08	0.0014054219	0.3281832619	1.29E-08	0.0014054219	0.3281832619	0.207496929	9.02E-08	0.0039093342	0	0	0	0	0.0002079978	0.0001647215	0.0000122
g__Microbacterium	NA	0.3355612779	NA	0.0603287734	0.0009620608	0.0240980283	0.3355612779	NA	0.0603287734	0.0009620608	0.0240980283	0.3355612779	0.3175862877	0.001004481	0.0673560915	0.0603287734	0.0009620608	0.0240980283	0.0010827997	0.2376923794	0.00126333	0	0	0.000000277	0	0.00000145	0.0022093893	0.00000374
g__Diaminobutyricimonas	0.0396217342	0.00000122	0.960650177	0.0156993898	0.1983967654	0.000000576	0.00000202	0.013971187	0.7811573313	0.0005895807	0.0002153367	0.00000129	0.00000219	0.000000999	0.00000602	0.0028661468	0.1100553858	5.97E-08	0.0000605	0.0002643493	3.34E-09	0.0000115	0.0000259	0.0025171144	0.0000112	0.0000309	0.00000569	0.0000828
g__Lysinimonas	0.0000268	0.0000919	0.000000221	0.024106037	0.0179604995	0.0006458779	0.00000031	0.0072021746	0.0188693932	0.109545821	0.000000002	0.000000167	0.00000287	0.00000163	0.079164567	0.00000686	0.0011070157	1.61E-10	0.6897673943	0.000000817	0.00000124	0.0000226	0.00000419	0.00010213	0.000000626	0.0000146	0.000013	0.0000645
g__Leucobacter	NA	NA	NA	0.0917163066	1E-15	0.1636292271	NA	NA	0.0917163066	1E-15	0.1636292271	NA	0.0917163066	1E-15	0.1636292271	0.0917163066	1E-15	0.1636292271	1.14E-18	0.2049632563	5.63E-16	0	0	0	0	0.0000259	0.0011850454	0.00000133
g__Tetrasphaera	0.7742472755	0.155571141	0.00000161	5.59E-09	3.39E-08	8.41E-12	0.0585216901	3.39E-17	3.31E-23	2.79E-12	3.68E-22	1.5E-13	2.41E-16	3.4E-13	1.12E-14	0.00000139	0.0249851656	3.13E-25	0.2512384675	2.36E-19	6.69E-10	0.0531863812	0.0530059161	0.0611198457	0.0198541141	0.0105440828	0.0143080551	0.0001457197
g__Serinicoccus	NA	0.3355612779	NA	9.03E-13	0.00000397	0.019538563	0.3355612779	NA	9.03E-13	0.00000397	0.019538563	0.3355612779	9.13E-13	0.00000588	0.042933511	9.03E-13	0.00000397	0.019538563	0.1641707688	1.66E-08	0.0004649691	0	0	0.000000831	0	0.0001305623	0.0000976	0.0000191
g__Myceligenerans	0.3292565772	0.0980507278	3.53E-22	0.000000217	0.000000004	NA	0.3705274796	1.43E-22	0.000000298	4.34E-09	0.3292565772	8.24E-23	0.000000505	5.39E-09	0.0980507278	0.00000245	0.0017039064	3.53E-22	0.0834799695	0.000000217	0.000000004	0	0.000000311	0.00000052	0.0002301691	0.000099	0.0001283704	0
g__Brevibacterium	NA	NA	0.0494481511	4.86E-16	1.27E-08	0.2041772903	NA	0.0494481511	4.86E-16	1.27E-08	0.2041772903	0.0494481511	4.86E-16	1.27E-08	0.2041772903	2.18E-16	2.27E-08	0.90666717	0.2446645449	3.04E-16	0.000000019	0	0	0	0.00000236	0.0001050298	0.0000852	0.00000398
f__Dermatophilaceae;g__unclassified	0.0091873868	0.250621752	0.0012705893	0.0009772292	0.0009772292	0.8338107695	0.0000325	3.31E-08	2.76E-08	2.76E-08	0.0606709761	0.0004155335	0.0002845744	0.0002845744	0.6649897322	0.1599861788	0.1599861788	0.0891126874	NA	0.0788113681	0.0788113681	0.0000897	0.000208341	0.0000309	0.00000081	0	0	0.0002654528
g__Cellulomonas	0.0856743074	0.0003235927	3.39E-26	2.69E-08	2.32E-09	NA	0.0038181225	1.81E-27	6.23E-08	3.06E-09	0.0856743074	2.3E-27	0.00000153	5.64E-08	0.0003235927	8.61E-11	2.26E-14	3.39E-26	0.7357562675	2.69E-08	2.32E-09	0	0.00000105	0.00000462	0.0004912141	0.0001440579	0.0000954	0
g__Salana	0.3292565772	0.3355612779	NA	0.3245871275	0.0187243134	0.043191793	0.7202246051	0.3292565772	0.6768567292	0.0192114425	0.1173335962	0.3355612779	0.9425161634	0.0190051203	0.0750538854	0.3245871275	0.0187243134	0.043191793	0.0189773305	0.0707230718	0.0214516125	0	0.000000326	7.35E-08	0	0.000000145	0.0031161583	0.00000252
g__Dietzia	0.0006849217	7.92E-08	0.0001145214	0.3245871275	0.1724388534	NA	0.004821416	0.0623372665	0.0011365966	0.0011817938	0.0006849217	0.00000043	4.71E-08	6.49E-08	7.92E-08	0.0008395128	0.0007813257	0.0001145214	0.9156602333	0.3245871275	0.1724388534	0	0.000073	0.0001348857	0.0000221	0.0000025	0.0000011	0
g__CL500-29 marine group	0.00000899	0.0000222	0.0000105	0.0000135	0.0001454999	0.0004406321	6.32E-12	0.7939951658	0.7202146444	6.56E-09	1.3E-10	9.16E-14	1.92E-14	0.3432934912	0.7220176448	0.9082509668	5.35E-09	6.57E-11	4.87E-09	5.31E-11	0.2760932739	0.0002180372	0.0000468	0.0004586652	0.0000567	0.0000606	0.0006006913	0.0004638146
g__Iamia	0.3348760884	0.00000471	0.0751641694	0.001638046	0.0009811486	0.000000292	0.0000443	0.8341543525	0.0465520245	0.0072589923	0.000043	0.000033	0.0077939289	0.362574245	0.4995213044	0.0258258726	0.0056843553	0.0000057	0.193223875	0.0222329502	0.6759931745	0.0000302	0.0000573	0.0002149206	0.00005	0.0001246526	0.0002076414	0.0001891664
p__SHA-109;g__unclassified	2.99E-10	0.0000112	2.75E-18	5E-16	0.00000576	0.0730468058	0.000086	0.000000005	4.18E-09	0.1642810855	5.52E-11	0.0014108933	0.0022408295	0.0001752037	0.00000933	0.4142846802	0.0030513152	8.31E-19	0.0006769408	1.97E-16	0.00000213	0.0000954	0.0008826253	0.0155242575	0.0029707342	0.0033973096	0.0016420174	0.0000632
p__TM6;g__unclassified	0.0054752281	0.2359747852	0.0005059007	0.132734657	0.6815330664	0.0003746389	0.0857319175	0.0436376173	0.0239099222	0.0046550718	0.0209295019	0.0078284738	0.8772434149	0.1415738621	0.0056441338	0.0000469	0.0005402576	0.5994935424	0.080520994	0.0000194	0.0004061269	0.0000859	0.0000127	0.0000441	0.00000375	0.0000411	0.0001343748	0.00000171
p__Candidate division WS6;g__unclassified	7.71E-08	0.1173218053	0.1710138075	0.0001158974	0.000000874	2.31E-12	0.000000853	1.91E-08	1.58E-09	1.09E-10	9.57E-11	0.0201315639	0.000203358	0.0000033	0.000000256	0.0111824028	0.0000444	7.35E-11	0.0320405691	0.0000163	0.1381417533	0.0000754	0.0006843369	0.000123186	0.0000685	0.000038	0.0000208	0.00000551
g__Skagen138	2.11E-09	3.66E-08	0.087427174	3.87E-10	3.41E-14	4.01E-11	0.8784263166	1.33E-21	5.56E-15	3.24E-15	1.39E-18	1.18E-10	2.14E-15	3.87E-16	1.62E-17	4.1E-09	2.74E-13	1.08E-10	4.68E-09	0.0118526503	3.58E-11	0.0001552689	0.0000118	0.0000172	0.0002036696	0.0010656984	0.003225537	0.0006094234
g__Gemmatimonas	0.0000364	0.000000001	0.0004380308	0.00000089	4.31E-18	0.0002539843	1.48E-10	0.4483998799	1.06E-10	1.01E-18	3.43E-13	3.74E-10	8.28E-14	1.04E-18	4.33E-17	2.74E-10	1.94E-20	4.71E-12	1.09E-08	0.0013568182	9.96E-16	0.0000986	0.0000291	0.000000777	0.0000463	0.0004555433	0.0010834308	0.0001930356
c__Cyanobacteria;o__SubsectionIII;f__FamilyI;g__unclassified	0.0032461166	0.4601353316	0.1540485762	5.09E-13	0.00769998	0.000000416	0.0236307342	0.00000104	2.61E-11	0.2833579419	0.00000834	0.0270183995	7.36E-12	0.0239953766	0.000000946	4.02E-18	0.0005398071	0.000000103	0.0002465384	0.044660604	0.0001082794	0.0000103	0.0000219	0.0000122	0.00000873	0.0001083496	0.0000485	0.0002317356
c__ML635J-21;g__unclassified	0.2653290238	0.0101314473	0.3721415375	0.0008609442	0.0028915904	9.46E-09	0.000217246	0.0171371268	0.00000171	0.0005033789	0.000000003	0.0326293481	0.4610545967	0.1036157469	0.00000051	0.0019679048	0.0072247573	2.97E-08	0.2086567724	0.00000127	0.000433878	0.0000603	0.0000432	0.0001084446	0.0000751	0.0001325628	0.0002322329	0.0005766589
p__SM2F11;g__unclassified	NA	NA	NA	NA	0.0013697201	0.3281832619	NA	NA	NA	0.0013697201	0.3281832619	NA	NA	0.0013697201	0.3281832619	NA	0.0013697201	0.3281832619	0.0013697201	0.3281832619	0.0015101108	0	0	0	0	0	0.0004184132	0.000000443
g__CYCU-0281	4.39E-08	3.25E-10	3.31E-09	0.0088073402	0.0006418014	0.0017719128	4.29E-10	0.2683673918	5.63E-12	0.000000207	7.69E-17	0.0000204	3.24E-21	9.45E-09	9.65E-18	5.5E-11	8.42E-08	3.3E-19	0.0000275	3.21E-10	0.0230386261	0.012847361	0.0022132056	0.0002237475	0.0024273955	0.0079335553	0.0433209076	0.0203731842
f__Saprospiraceae;g__unclassified	7.23E-08	0.00000001	0.000083	0.0642601493	0.00000067	0.000000398	0.0206717654	0.000000275	1.29E-12	4.16E-11	0.459844783	1.7E-10	7.59E-14	1.5E-11	0.0388112899	1.68E-08	0.000000001	0.0044592205	0.0000359	6.68E-11	1.76E-11	0.0060376246	0.0009934462	0.0006216773	0.0025359393	0.0089574588	0.0212037947	0.001509086
g__QEDR3BF09	3E-11	0.017045286	0.0008700049	0.0001623773	0.0008785435	0.0071103273	0.0008734212	7.03E-11	1.49E-13	0.00000407	8.53E-10	0.8043257532	0.9221428483	0.0001047774	0.0001030683	0.7714688798	0.0001144943	0.0000125	0.0000994	0.00000703	0.0138344493	0.0008982664	0.0000787	0.0005333846	0.0005355162	0.0004685588	0.0061634113	0.001794528
g__Aureispira	0.0001361783	0.0076479283	0.9018263097	0.0002023087	0.7369731114	0.0001148523	0.0125406504	2.09E-12	6.56E-15	0.000000242	0.7475618639	0.0001345092	1.45E-11	0.0002602646	0.010210589	0.000000235	0.5272539545	1.27E-12	0.0000339	3.43E-15	0.000000173	0.0001002609	0.00000127	0.0000183	0.0000808	0.0002985712	0.0000999	0.00000209
g__Haliscomenobacter	3.39E-15	3.17E-15	2.9E-14	0.3867407682	2.25E-10	9.37E-14	0.1070569636	0.0652983469	8.16E-16	4.57E-15	0.0369375543	0.0014996753	3.17E-16	1.14E-15	0.0008745551	1.82E-14	1.73E-14	0.7324601416	3.89E-11	9.03E-14	1.72E-14	0.0017096255	0.000200867	0.0001287583	0.0002996239	0.0016186226	0.0069377248	0.0003030057
g__Lewinella	4.55E-09	0.0003948163	0.000000171	1.94E-08	0.471011671	2.25E-08	0.0002060405	0.00000425	0.0287109644	0.000000005	0.0107312654	0.025755998	0.0011657095	0.0001708969	0.0027658708	0.0016780872	0.000000228	0.0406247939	2.09E-08	0.407972565	3.25E-08	0.0004062099	0.00000768	0.0001318845	0.0000468	0.000017	0.000531446	0.0000236
g__Phaeodactylibacter	0.0986490793	2.17E-08	0.00000946	7.84E-17	0.00000344	5E-15	3.19E-08	0.0000299	2.77E-16	0.00000732	3.51E-15	0.3683018675	0.0146089513	0.0457906152	1.15E-10	0.7120054774	0.3544803627	0.000017	0.3971609497	1.12E-08	0.001565443	0.000000625	0.00000219	0.0000553	0.000180213	0.0001002084	0.000181748	0.0003369149
g__MK04	0.0562380752	0.3702952029	0.8292494644	0.000000804	0.9617818072	0.0512211881	0.3587308946	0.0290462215	0.000000324	0.101066022	0.0027468803	0.2665773181	0.000000497	0.4116848517	0.0138218601	0.000000902	0.8902970409	0.0679727981	0.000000844	0.00000499	0.070298713	0.0000133	0.00000515	0.00000863	0.0000216	0.0015732482	0.00002	0.0000573
g__Terrimonas	0.0054658332	0.0000191	0.00000101	0.3670875718	0.0135755927	0.0002549746	0.0000379	5.61E-10	1.82E-09	6.95E-10	0.000000268	0.0086973201	6.29E-15	2.94E-13	5.29E-09	4.62E-22	1.76E-15	7.54E-10	0.0107880292	0.0004253187	0.0175980634	0.0022679159	0.000896211	0.0003304817	0.0002061703	0.0025034423	0.0035906158	0.0068359913
g__Niabella	8.8E-14	0.000000178	1.01E-22	1.18E-09	6.74E-11	0.512294657	4.13E-12	8.69E-11	4.09E-13	0.0000158	4.41E-14	0.038815701	0.0005605485	8.06E-10	6.29E-08	1.98E-12	2.33E-09	1.15E-23	2.42E-10	8.28E-10	5.91E-11	0.0000379	0.0061176354	0.0006673173	0.0009623802	0.0002810949	0.0214548493	0.0000397
g__Filimonas	9.65E-16	3.65E-18	5.03E-13	1.51E-11	1.07E-18	8.27E-14	0.0017564083	0.000014	0.0006737282	0.0002355573	0.348328892	9.14E-12	5.76E-09	0.6741559771	0.0002062426	0.7160459721	2.03E-19	0.0015654163	2.1E-10	0.0159321294	0.0000328	0.0054265147	0.0009583435	0.0003820123	0.0019989188	0.002063691	0.0003319392	0.0012343591
f__Chitinophagaceae;g__unclassified	2.35E-09	8.96E-12	3.28E-12	3.42E-10	3.74E-08	0.00000168	0.0001503784	0.0005778421	0.724152354	0.4747660943	0.0077385639	0.1312102793	4.35E-11	0.0000229	7.38E-10	1.06E-09	0.0000798	1.35E-09	0.5896734655	0.0021398007	0.0607817857	0.0093627988	0.0024436255	0.0005427979	0.0007280991	0.0023889456	0.0029815407	0.0041430133
g__Ferruginibacter	0.0000141	9.95E-08	0.0000638	3.61E-09	1.72E-08	1.88E-08	0.0138187619	0.9513896213	0.000000313	0.0000556	0.0000375	0.047164304	0.000029	0.0201108144	0.0119409098	0.00000731	0.0010754552	0.0007680851	0.00000458	0.000000292	0.7913667657	0.0089409698	0.002689021	0.0011962443	0.0040668627	0.0001698484	0.0006035951	0.0005552498
g__Taibaiella	4.04E-17	5.91E-14	5.91E-14	5.91E-14	5.91E-14	5.91E-14	0.0025051889	0.0025051889	0.0025051889	0.0025051889	0.0025051889	NA	NA	NA	NA	NA	NA	NA	NA	NA	NA	0.0007624206	0.0000169	0	0	0	0	0
g__Hydrotalea	0.0000675	0.7125963306	2.28E-11	1.96E-11	2.3E-10	0.3888152806	0.0013692558	0.000000219	0.000000138	0.0000021	0.0496001934	0.000000262	0.000000218	4.14E-08	0.480372129	0.8806738207	0.236458695	0.0022782415	0.2843644995	0.0020724306	0.000957375	0.0003482994	0.000185941	0.0003817932	0.0000801	0.0000744	0.0000624	0.0008642723
g__Flavitalea	4.61E-10	7.48E-17	7.38E-15	2E-16	1.03E-18	1.07E-12	1.04E-08	0.0001443526	2.18E-10	6.45E-11	0.2332511508	0.0000322	0.2899105051	0.2208988053	1.87E-08	6.18E-14	2.3E-10	0.0005080687	0.6814111027	8.04E-13	9.39E-13	0.0008121223	0.0002774131	0.0000395	0.0001259883	0.0000244	0.000025	0.0002191913
f__NS11-12 marine group;g__unclassified	0.7337720928	0.0905478565	0.0049879241	7.56E-09	3.27E-11	9.42E-14	0.112807583	0.0049113034	1.06E-08	6.58E-11	1.77E-13	0.943661687	0.0000182	3.05E-09	7.62E-14	0.000000739	3.63E-10	2.92E-13	0.0067047316	6.79E-10	0.00000222	0.00000898	0.00000874	0.0000439	0.0000358	0.0003082198	0.0005142792	0.0014776422
f__env.OPS 17;g__unclassified	0.0494017956	0.6605395412	0.0066832477	0.0009485435	0.5185037113	0.8616036683	0.000000411	3.64E-15	1.22E-23	0.0026066959	0.0001972987	0.00000315	2.61E-10	0.0272935868	0.2201546955	0.1243243461	1.48E-08	0.000000633	6.11E-12	3.39E-10	0.3896935346	0.0019165225	0.000437616	0.0014904183	0.0035106963	0.0039388144	0.001062817	0.0013073134
g__Pedobacter	0.0039373363	0.000000705	6.04E-16	0.0182464194	0.0001948636	3.9E-12	0.0000131	1.91E-12	0.4932388391	0.2458245008	2.27E-11	0.0645324534	0.00000462	0.0001012378	0.000069	7.94E-14	1.83E-10	0.0034331694	0.0690441867	9.76E-12	1.08E-10	0.0011239216	0.0016766296	0.0041347427	0.0055192252	0.0015659452	0.001983855	0.0081748334
g__Sphingobacterium	0.0004451312	0.0023114577	0.1029620604	0.0000184	2.07E-12	1.16E-11	0.8410407264	0.00000172	0.1429235775	8.43E-11	5.72E-11	0.000022	0.1432483465	2.86E-08	0.000000109	5.61E-08	7.66E-17	1.63E-16	0.000000108	0.000000204	0.4330159333	0.0003179936	0.0001610362	0.0001688455	0.0004613322	0.0001390646	0.0000206	0.0000209
g__Nubsella	1.63E-11	1.24E-11	1.44E-13	7.84E-12	0.1819908694	0.0023220818	0.0012685685	0.0001301678	0.4694100656	1.24E-12	1.84E-08	0.1217052343	0.0189604894	3.6E-13	2.06E-10	0.0014036822	1.4E-14	2.01E-11	6.87E-13	1.42E-08	0.000176413	0.0000232	0.0002650025	0.0004519922	0.0007167212	0.0003351324	0.0000214	0.000062
f__WCHB1-69;g__unclassified	NA	NA	NA	0.0031250914	0.0017606296	0.0838270725	NA	NA	0.0031250914	0.0017606296	0.0838270725	NA	0.0031250914	0.0017606296	0.0838270725	0.0031250914	0.0017606296	0.0838270725	0.4572959541	0.0094876343	0.0039362054	0	0	0	0	0.0001338458	0.0001562967	0.00000357
f__KD3-93;g__unclassified	0.5728451402	0.0682735149	0.0000322	0.0000362	0.6384924026	0.0001010327	0.1487419258	0.00000544	0.00000641	0.3071965757	0.000032	0.0004418567	0.0005144813	0.0307087462	0.002454257	0.7976732674	0.0000151	0.1471999344	0.000017	0.1890365559	0.000052	0.0001055106	0.000083	0.0000409	0.00000219	0.00000188	0.0001477061	0.00000681
f__PHOS-HE51;g__unclassified	0.3321949847	0.3321949847	0.128257204	1.48E-16	0.00000316	0.000000309	NA	0.0292726933	5.96E-16	0.00000291	0.000000194	0.0292726933	5.96E-16	0.00000291	0.000000194	1.69E-14	0.00000417	0.00000609	0.0000545	0.0240456063	0.0000236	0.000000685	0	0	0.00000638	0.0000526	0.0017090011	0.0000332
f__Cytophagaceae;g__unclassified	9.64E-13	5.1E-10	0.0058821841	0.00000567	0.4503065237	6.73E-13	0.0205379604	0.0000145	0.00000143	0.00000106	7.4E-18	0.0018361688	0.0013296193	0.0000477	1.6E-16	0.3862329434	0.1302405998	2.55E-16	0.0141309849	5.73E-16	6.62E-13	0.0174609105	0.004160337	0.0058969619	0.0132862017	0.0100329676	0.0168624761	0.0687444644
g__Runella	0.0074706187	4.13E-11	4.47E-09	0.0000011	0.00000183	0.0102183955	4.08E-09	0.0006902807	0.0113948445	0.000051	0.00000464	0.00000258	0.00000209	0.7760786905	7.79E-11	0.7589245654	0.0018434026	1.41E-23	0.0017566403	6.08E-11	0.000000254	0.0002737266	0.0007234469	0.0037418773	0.0013333654	0.0014788357	0.0050567841	0.000076
g__Emticicia	0.0000202	0.0000422	0.4658157783	1.74E-15	0.0031676736	0.0148875523	0.2836635276	0.0003222028	0.0003471915	0.5214482846	0.0004136697	0.0014438221	0.000000668	0.8592654406	0.0014129358	3.58E-13	0.01617951	0.4595374673	0.0003875958	8.66E-14	0.0262531385	0.0000683	0.0004118917	0.0002759749	0.0001632263	0.0008551157	0.0004015849	0.0001135521
g__Persicitalea	0.0020787353	4.29E-08	2.55E-10	0.000577731	1.64E-08	4.93E-11	0.0001136724	4.07E-10	0.1183592948	0.000000844	4.38E-10	1.88E-10	0.1386463978	0.0016498493	0.000000164	7.56E-09	9.05E-11	1.38E-12	0.00017362	1.09E-08	0.002880912	0.0016519944	0.0027587059	0.004924586	0.0004578054	0.0045102851	0.0094650241	0.0163565422
g__Flectobacillus	0.162563272	0.0426810947	0.0043293697	0.0005052398	0.0002499274	0.0835527941	0.1241425465	0.1488450305	0.0290721716	0.0003294455	0.7556018518	0.4339335447	0.7514519774	0.0008608711	0.1633994054	0.4377589947	0.0005114078	0.252261402	0.0006699376	0.0576695385	0.0003587491	0	0.00000122	0.00000764	0.00000407	0.00000486	0.0003714607	0.00000154
g__Leadbetterella	0.164816646	0.0212736536	0.1624335695	4.19E-08	0.000088	0.0052602192	0.1879576465	0.6602718405	4.52E-08	0.0000939	0.0072321854	0.083818899	5.15E-08	0.0001044739	0.0120978392	0.000000044	0.0000917	0.0064170172	0.1238331125	0.000000283	0.0004356509	0	0.000000671	0.00000131	0.000000502	0.0071860275	0.0038764573	0.0001184225
f__Rhodothermaceae;g__unclassified	3.63E-11	5.64E-11	5.94E-11	1.5E-11	0.012533471	0.3965640544	0.0184151459	0.0079932976	0.0147526129	6.76E-12	0.000122256	0.3355612779	0.0003068106	7.31E-12	0.0000649	0.0001915567	7.52E-12	0.0000605	3.12E-11	0.0005302279	0.6938551197	0.0004692087	0.00000343	0.000000151	0	0.000027	0.0002910029	0.0005925495
g__Soonwooa	0.0000022	0.0006853816	0.00000634	0.0019858805	0.0026487	0.0000201	0.0436165814	0.0000183	0.0002646661	0.0000013	0.0061162364	0.0061188729	0.0716651548	0.0003995947	0.546355203	0.1316226301	4.56E-08	0.001401648	0.0005470197	0.1160739389	0.00000711	0.0000242	0.007554969	0.0029881021	0.0003405589	0.001683853	0.00000576	0.0022217152
g__Flavobacterium	0.0000369	1.54E-11	0.00000684	0.00000421	4.34E-10	0.000489103	2.91E-08	0.9356275667	0.8612059272	0.00000807	1.52E-11	1.06E-16	5.95E-14	0.000076	8.18E-27	0.725992454	9.72E-13	8.49E-22	7.42E-10	5.05E-20	3.89E-27	0.0609527497	0.0297243744	0.0053741243	0.0290625604	0.0282601462	0.0101262621	0.0883524697
f__Flavobacteriaceae;g__unclassified	0.5176366998	4.08E-11	0.1747207293	0.0000205	1.61E-11	4.83E-11	4.9E-12	0.344639964	0.0000899	1.08E-12	1.65E-12	0.00000406	0.0001266809	0.4650148421	0.0009479712	0.0428622685	0.00000148	6.11E-08	0.0000288	0.000000233	0.0023297782	0.0003435253	0.0003093213	0.0000128	0.0003870567	0.0001507378	0.0000116	0.000000542
g__Chryseobacterium	0.0015409079	0.000000706	0.000000367	0.000000343	0.000000404	0.000000326	4.06E-09	7.52E-10	6.63E-10	0.000000001	6.13E-10	0.00000558	0.000000523	0.000024	0.000000137	0.5102029547	0.4089411456	0.2035748554	0.0993019516	0.5354682697	0.0140067514	0.0158243723	0.0043527586	0.0000868	0.0000312	0.0000204	0.000024	0.0000109
g__Cloacibacterium	0.0099829026	0.0078586131	0.8067794183	0.23785734	0.3196762025	0.0020165941	0.7437653868	0.1032573796	0.0401928502	0.0539298529	0.0841420646	0.0852688005	0.0323246809	0.0421838546	0.3355612779	0.5467348449	0.622478638	0.0380014194	0.8799795763	0.0017414649	0.0061216923	0.0000187	0.00000193	0.00000191	0.0000612	0.0000122	0.0000119	0
f__NS9 marine group;g__unclassified	0.0004905206	0.0006148499	1.24E-10	1.79E-10	9.81E-09	0.0000128	0.3343244373	3.47E-12	3.08E-12	4.38E-11	0.000002	1.05E-12	8.3E-13	2.07E-11	0.00000105	0.25622941	0.0001915586	0.8908790589	0.0025691866	0.4814530072	0.0134438385	0.0000379	0.0000149	0.0000126	0.0008709967	0.0006197134	0.0002699231	0.0009072972
g__PHOS-HE28	0.0000972	1.8E-12	0.000000932	0.0000617	0.0038403935	1.63E-08	0.000000194	0.2303177345	0.2784327924	0.075642066	0.0632813537	0.00000388	8.02E-20	7.24E-13	0.000000181	0.0112868034	0.0025981303	0.6462918006	0.2034021649	0.0000941	0.0000454	0.000190994	0.0000813	0.00000195	0.0000773	0.000087	0.0001125517	0.0000424
g__Fluviicola	6.43E-19	0.00000219	0.0000103	9.08E-12	0.1423044569	2.35E-08	0.000000223	0.8402973972	0.017430601	1.52E-16	0.0001951882	0.0093864068	0.0025149539	0.0000888	0.00000122	0.2386298525	0.0000502	0.0014528991	0.000000001	0.0000258	0.000000048	0.00000815	0.0002978476	0.0000878	0.0006895892	0.0002329786	0.0000221	0.0015624444
g__Paludibacter	0.0064905991	0.2453908482	0.3759010888	0.1519558021	0.0180400328	0.00000653	0.2585483317	0.2310990075	0.0000282	0.7297073992	0.000000684	0.8733971984	0.0200073381	0.3955158104	0.00000199	0.0460460009	0.3452396913	0.0000024	0.0001535217	0.0000242	0.000000854	0.0000742	0.0000285	0.000054	0.0001158207	0.0001226851	0.0000352	0.0011452044
f__Porphyromonadaceae;g__unclassified	NA	NA	NA	0.3245871275	NA	1.9E-11	NA	NA	0.3245871275	NA	1.9E-11	NA	0.3245871275	NA	1.9E-11	0.3245871275	NA	1.9E-11	0.3245871275	1.93E-11	1.9E-11	0	0	0	0	0.00000011	0	0.0032145082
g__Blvii28 wastewater-sludge group	0.001830822	0.000000262	6.49E-11	1.9E-11	0.0001039498	4.75E-12	0.0000183	7.24E-10	2.83E-08	0.0779961842	9.43E-12	0.000000623	0.1146528925	0.0043995825	1.58E-10	0.00000904	6.87E-09	0.00041629	0.0000446	4.96E-10	1.55E-11	0.00000719	0.0000519	0.0002648472	0.002823776	0.0004690773	0.0001235187	0.0056319758
f__Bacteroidales S24-7 group;g__unclassified	0.1549155178	4.75E-09	0.000211349	0.000211349	0.000211349	0.000211349	1.58E-08	0.00000123	0.00000123	0.00000123	0.00000123	5.08E-09	5.08E-09	5.08E-09	5.08E-09	NA	NA	NA	NA	NA	NA	0.00000939	0.0000161	0.0002497641	0	0	0	0
c__WCHB1-32;g__unclassified	0.1032211624	0.0015742588	0.00000119	0.0020594595	0.0642407889	0.00000649	0.024072134	1.15E-09	0.0001470283	0.8027456571	0.000000974	1.99E-11	0.00000804	0.0314997736	0.0443335432	0.7928531087	5.17E-10	6.37E-14	0.0001068716	0.000000527	0.000000225	0.0000351	0.0000176	0.00000798	0.0001922064	0.0002494376	0.0000156	0.000000545
p__Saccharibacteria;g__unclassified	2.79E-10	9.4E-09	1.01E-25	3.29E-20	8.79E-24	0.0030367394	0.0258381898	7.43E-14	1.29E-11	5.32E-24	0.00000769	9.22E-08	0.000000809	8.24E-16	9.08E-08	0.7495934264	8.45E-16	2.28E-20	8.06E-14	4.18E-18	1.76E-27	0.0000703	0.0155058174	0.0252076547	0.0715828169	0.0701190966	0.1685641892	0.0042919064
g__Candidatus Saccharimonas	4.48E-10	1.95E-10	0.00000865	2.85E-16	2.57E-08	0.8701948432	0.00000135	6.99E-08	0.00000154	0.000000176	4.34E-10	0.0717027766	0.8593892487	0.1085297615	1.88E-10	0.0585532679	0.5953612619	0.00000756	0.0853453102	2.24E-16	2.28E-08	0.00000505	0.0027434413	0.0004257727	0.0004759942	0.0004791015	0.0003394492	0.00000581
f__S29;g__unclassified	0.0021931593	0.00000828	3.81E-20	0.000000087	2.65E-09	0.003333207	0.0125469428	9.47E-08	0.00000019	7.66E-09	0.5539283878	0.0028015728	0.000000449	0.000000046	0.0017428223	0.00000112	0.00000038	1.21E-10	0.0017670636	0.00000016	6.05E-09	0	0.0000173	0.0000361	0.0000774	0.007224232	0.001197161	0.0000121
g__Skagenf80	NA	NA	NA	NA	0.0834705124	0.3281832619	NA	NA	NA	0.0834705124	0.3281832619	NA	NA	0.0834705124	0.3281832619	NA	0.0834705124	0.3281832619	0.0834705124	0.3281832619	0.2396044299	0	0	0	0	0	0.000002	0.000000443
p__Microgenomates;g__unclassified	1.23E-08	0.8708358193	1.28E-08	0.0001410542	0.0039583471	0.0000219	1.33E-08	3.17E-13	4.08E-13	3.38E-11	6.67E-13	1.14E-09	0.0000335	0.0020535437	0.00000339	0.0157709984	0.0252917154	0.0074620195	0.7224061425	0.8668166375	0.603094408	0.0003461802	0.0014256322	0.0003435737	0.0000396	0.0001651553	0.0001930201	0.000111036
f__Anaerolineaceae;g__unclassified	0.2079382501	0.0254542337	3.61E-08	9.24E-10	1.84E-10	3.24E-10	0.1284853636	1.05E-16	8.61E-19	6.02E-17	7.9E-20	2.64E-09	2.59E-10	4.17E-12	9.09E-11	0.000000102	0.0071611901	4.69E-08	0.7736408664	0.3157913005	0.4030635513	0.0126852049	0.0143322934	0.0170818764	0.0035072171	0.0020368689	0.0024114331	0.0018161368
g__Candidatus Villogracilis	0.000000491	0.0007498535	7E-10	0.2149566237	0.0027004557	0.0023814017	0.0001003475	5.49E-14	0.0001700995	0.005514487	1.34E-11	0.000000001	0.1075748133	0.9349709828	9.73E-09	1.06E-08	0.000000201	2.85E-14	0.140472898	0.0001715111	9.78E-08	0.0004837481	0.0000819	0.00020775	0.0000104	0.0004600589	0.0002447852	0.0008744258
g__Leptolinea	0.000000472	0.000000293	0.0037411551	0.0046351884	0.0038329068	0.0960713307	0.0003834173	3.39E-10	3.94E-10	2.56E-10	1.22E-09	0.000000129	0.000000136	0.000000118	0.000000135	0.8268707901	0.9617589168	0.0915548989	0.8046017868	0.1167525155	0.0955384109	0.0000102	0.0000682	0.0002285442	0.00000134	0.00000121	0.00000105	0.00000468
c__Ardenticatenia;g__unclassified	5.15E-08	8.51E-08	1.1E-24	6.76E-08	0.002420454	2.61E-14	0.00000542	6.37E-10	0.070951724	0.1088645024	3.21E-08	0.0181296905	0.00000133	0.000000479	0.0368439806	1.44E-16	4.07E-09	0.6639491422	0.7305213825	5.56E-11	0.000000009	0.0000127	0.0001963941	0.0012970519	0.0007058596	0.0001292344	0.000155611	0.0007585338
f__Caldilineaceae;g__unclassified	3.84E-17	8.32E-08	0.4707557392	1.23E-17	0.0043547242	1.54E-16	0.000036	4.13E-15	1.97E-27	7.56E-15	1.81E-28	6.06E-08	1.59E-09	6.36E-09	1.91E-09	9.12E-18	0.002578679	1.03E-15	3.48E-08	0.0175984577	0.000000953	0.0001659162	0.000600461	0.0017700659	0.0002088576	0.00000481	0.0001066553	0.0000113
g__Candidatus Defluviifilum	1.38E-11	2.9E-10	3.16E-20	5.37E-15	1.86E-15	8.7E-09	8.22E-08	0.0000485	0.0000453	0.2157654294	6.25E-08	1.14E-08	4.76E-09	0.000000505	1.19E-09	0.77346982	1.86E-08	0.0000455	1.42E-08	0.0009346521	7.05E-12	0.0000033	0.0002814274	0.0013275107	0.000101199	0.0001044093	0.0003381795	0.0000487
o__JG30-KF-CM45;g__unclassified	0.0005453648	0.000000479	0.0433563319	0.0004166419	0.0004166419	0.0004166419	0.00000383	2.05E-10	1.51E-11	1.51E-11	1.51E-11	0.000000297	0.000000199	0.000000199	0.000000199	0.0011569127	0.0011569127	0.0011569127	NA	NA	NA	0.0000117	0.0000303	0.0005101659	0.00000534	0	0	0
f__Roseiflexaceae;g__unclassified	0.3292565772	0.0321116625	NA	NA	0.0025273811	0.3281832619	0.061138063	0.3292565772	0.3292565772	0.0028798146	0.8421843054	0.0321116625	0.0321116625	0.0074346877	0.0786676279	NA	0.0025273811	0.3281832619	0.0025273811	0.3281832619	0.0030154307	0	0.000000279	0.00000291	0	0	0.000153429	0.000000545
g__Kouleothrix	1.76E-12	2.92E-08	0.1667972348	0.6066452412	0.0001001592	0.0078935466	0.3409980365	4.1E-12	2.27E-12	0.0026712687	0.000000538	4.54E-08	3.97E-08	0.0041127012	0.00000174	0.3407990803	0.0001317163	0.060733256	0.0001092439	0.0146977383	0.0002598332	0.000000625	0.0000328	0.0000415	0.00000271	0.00000129	0.0006504291	0.00000812
g__Herpetosiphon	0.0032359884	0.010160094	0.022919975	0.3579526827	0.00000198	0.0000372	0.6179856267	0.0003176501	0.0473948161	0.00000329	0.0041030707	0.0005556702	0.1147521086	0.0000296	0.0039341799	0.0065429664	0.00000451	0.0000279	0.00000531	0.0003561807	0.0068732907	0.0006576485	0.0001930601	0.0002220725	0.0036500678	0.0006543642	0.0000261	0.0000705
f__Verrucomicrobiaceae;g__unclassified	0.0101664437	0.6912086656	0.0003041506	0.00000112	4.41E-13	2.25E-12	0.0411475059	1.35E-09	0.0000474	3.08E-11	2.66E-11	0.0002487126	0.00000252	1.87E-12	2.77E-12	3.43E-09	1.24E-15	2.03E-13	0.1000929917	0.00000335	0.0000501	0.0000693	0.0001148495	0.000076	0.0000302	0.000521318	0.0005900017	0.0013190651
g__Prosthecobacter	NA	NA	NA	0.0257195775	0.000000558	0.000000165	NA	NA	0.0257195775	0.000000558	0.000000165	NA	0.0257195775	0.000000558	0.000000165	0.0257195775	0.000000558	0.000000165	0.00000304	0.000000198	0.00000083	0	0	0	0	0.00000181	0.0000274	0.0026738063
g__Brevifollis	2.48E-10	3.86E-10	7.72E-11	4.18E-09	0.0960246511	0.0207348941	0.8700570015	0.0576867284	0.0047906522	0.000000955	7.17E-13	0.0360217545	0.0064685769	0.00000106	2.02E-12	0.0000113	0.00000036	2.02E-14	0.00000652	7.93E-10	0.0065049172	0.0001652427	0.00000656	0.00000572	0.00000482	0.0000213	0.0003611526	0.0001034382
f__DEV007;g__unclassified	0.00000013	0.0003648302	7.24E-09	7.86E-09	6.27E-09	0.0002230461	7.73E-14	2.09E-16	3.69E-16	1.59E-16	0.0111167789	0.00000175	0.00000182	0.00000145	0.0000222	0.8001585043	0.8068071641	0.00000185	0.9765776269	0.00000181	0.0000018	0.0001204774	0.0003582962	0.0000373	0.00000114	0.000000599	0.000000722	0.0016343011
c__OPB35 soil group;g__unclassified	0.7686950542	0.0006345236	0.00000055	0.025015441	0.0010052296	0.0056023691	0.000000193	1.19E-16	0.0003908973	0.00000353	0.00000179	0.0000953	0.0813023298	0.9269695056	0.147293085	0.000000664	0.0014690231	5.16E-08	0.1133698528	0.5523849069	0.2051526682	0.0001179318	0.0001119937	0.0000322	0.0000127	0.0000667	0.0000403	0.0000469
c__OM190;g__unclassified	0.000046	0.00000153	0.0000431	0.0534737276	0.0000796	0.000141172	0.0440524106	7.84E-14	1.02E-08	0.7822849907	0.5671217333	2.79E-14	5.53E-10	0.1356452234	0.0156878118	0.01889635	1.06E-12	3.03E-13	4.81E-08	4.11E-08	0.4683588055	0.0009393034	0.0004076824	0.0002788451	0.0018925395	0.0013598915	0.0004167894	0.0004458742
g__SM1A02	0.0001983875	0.0030876527	0.000000054	0.0076841395	0.0001219604	9.35E-13	0.3064300431	0.005014699	0.4738872833	0.0025281512	3.17E-10	0.0003723177	0.8940654143	0.0012093108	9.25E-11	0.0020044509	0.0307936488	0.000000153	0.0014758077	5.73E-11	0.3648472274	0.0001609505	0.0003495864	0.0002886718	0.000627326	0.0003487558	0.0017277593	0.0017017733
o__ODP1230B30.09;g__unclassified	4.76E-11	4.08E-10	8.38E-31	1.24E-18	0.0014865482	2.37E-08	0.0000771	0.0663026823	0.0000285	6.79E-10	0.000000315	0.0010086173	7.19E-08	6.01E-10	3.4E-09	2.9E-19	5.23E-26	5.78E-18	8.28E-11	0.0039528995	0.0003665417	0.0000116	0.0008311555	0.0019535733	0.0010459777	0.0002697895	0.0000546	0.0001673827
c__BD7-11;g__unclassified	0.000000331	2.81E-09	7.99E-10	1.33E-10	3.41E-10	3.25E-08	0.0512044709	0.0890370013	0.0013998943	0.0148181728	0.5905866192	0.8039320533	0.2570707635	0.7603020952	0.1156852678	0.1620535945	0.5648057181	0.194564639	0.3121810162	0.0025830391	0.0352781529	0.0001747433	0.0000395	0.0000159	0.0000331	0.0000101	0.0000135	0.0000316
c__vadinHA49;g__unclassified	0.1457633255	0.010585096	0.0208767543	0.9932826207	0.0550723649	0.0209747401	0.072416352	0.00000202	0.0989323039	0.3596282614	0.0028749528	9.59E-09	0.0033418782	0.7031006239	0.0006244303	0.0098800614	0.0000168	0.1997859901	0.0375865071	0.0191839255	0.0012987067	0.0000863	0.0000407	0.0000199	0.0001627501	0.0001008974	0.000049	0.000434611
g__Isosphaera	0.0063057062	0.000000041	1.06E-11	0.0005580307	0.0039413208	NA	4.65E-08	0.0000151	0.8068155344	0.9740558979	0.0063057062	0.000000309	0.000000057	4.94E-08	0.000000041	0.000000326	0.0000109	1.06E-11	0.7722618866	0.0005580307	0.0039413208	0	0.00000579	0.0005646563	0.0000273	0.00000486	0.00000569	0
g__Leptospira	0.0000108	0.0011928512	0.0521154642	0.2185468891	3.65E-13	5.83E-08	0.6838324217	0.0208473767	0.00000934	4.95E-12	0.0316033383	0.125338806	0.0002301843	0.00000178	0.0668565661	0.0084448606	1.5E-12	0.0001825347	4.79E-13	0.000000124	5.02E-10	0.0002451336	0.0000979	0.0001167288	0.0001997161	0.0003697714	0.00000719	0.0000642
f__Leptospiraceae;g__unclassified	0.0555089618	0.0000265	5.38E-09	0.0768580089	0.0339885927	4.53E-08	0.0000021	0.000000169	0.9822452773	0.0017292657	0.000000565	0.9089750057	0.00000278	0.0987519873	1.87E-10	0.000000118	0.0484437455	3.55E-10	0.0025206532	0.000000547	1.64E-09	0.0001146567	0.0002048869	0.000029	0.0000239	0.0002357133	0.0000889	0.001159902
g__Turneriella	0.0715913302	0.00000272	0.0091127588	1.96E-10	0.5061351745	0.000000426	0.000019	0.9262759385	1.34E-08	0.2700867573	0.0000425	0.0000217	0.2253242277	0.00000374	0.2344449334	6.69E-09	0.1383776772	0.0000191	6.94E-10	0.0148846127	0.00000194	0.0000872	0.000172344	0.0007733573	0.0001658869	0.001137003	0.0001212672	0.0006043067
f__Spirochaetaceae;g__unclassified	0.0026542117	0.2769629116	0.000000922	0.0018906195	1.82E-12	0.00000461	0.0090044874	0.5291394849	0.0001923654	0.00000137	0.5206578348	0.0000181	0.00160548	7.12E-09	0.0000372	6.93E-09	5.4E-13	0.9893288541	0.00000108	8.39E-08	1.23E-10	0.0006254331	0.001992997	0.0007487866	0.0022708738	0.0004447539	0.0001345483	0.0021111528
g__Salinispira	2.06E-09	4.05E-10	4.54E-10	2.19E-09	5.56E-09	0.0796678475	5.27E-08	0.0383347503	0.0635676527	0.0015704511	1.68E-14	0.0081941808	0.000000125	1.64E-09	3.04E-15	0.0017173759	0.0000225	1.16E-15	0.326437627	5.58E-15	2.76E-14	0.0015276134	0.0000319	0.00000282	0.0000325	0.0000768	0.0000808	0.002054159
g__Spirochaeta 2	0.1888946658	0.0020546737	7.53E-11	1.23E-09	0.00000028	1.35E-10	0.0006468317	1.48E-08	1.59E-09	0.0140557188	2.04E-11	0.5581228341	0.7150725259	0.0000543	0.00000019	0.0942117242	6.38E-18	1.08E-08	2.07E-14	5.35E-08	9.37E-12	0.0003825329	0.0003509772	0.00185984	0.0013915619	0.0019151791	0.0001148531	0.0097858651
g__Brachyspira	2.94E-16	2.33E-12	0.000000223	0.0465231027	0.3301889292	0.0432143928	0.0003776656	6.61E-09	3.26E-19	9.41E-21	1.29E-08	0.0004287203	1.38E-13	5.34E-15	0.0000086	7.53E-12	1.92E-10	0.0239265461	0.0900652304	0.0014945841	0.0073822699	0.00000922	0.0001963075	0.0001231999	0.0000789	0.0000015	0.00000349	0.0000469
